# Supplementary material for: Machine learning analysis of type VII secretion system expression and its relationships with virulence traits and antibiotic resistance in Staphylococcus aureus
Source: Research Square preprint supplement (doi:10.21203/rs.3.rs-7352746/v1), 2025-08-25
Supplement: Supplementary file 1 [file b414eed000b68446c6019f02.xlsx]

## Sheet: DATA
Criticality	Critical score	DNase zone mm	DNase	DNA score	Hemolysin SBA	Hem score	Zone hemolysin mm	MRSa/MSSA	MRSA score	pneumonia score	Hemolysin SBA	MRSA score	Pig	150mrsa		Pigment Production	sepsis score	pneumonia score	MRSA score	Criticality	NC-mrsa	MRSA score	both c+mrsa	bothc+mssa	D- more+med	DNase	Pig	score pig	score dead
C	1	11	More	3	Medium	2	7	MRSA	1	1	Medium	1	Medium	MRSA	1	Medium	0	1	1	C	0	1	1	0	1	More	Medium	2	1
NC	0	9	Medium	2	Medium	2	9	MRSA	1	0	Medium	1	Less	MSSA	0	Less	0	0	1	NC	1	1	0	0	1	Medium	Less	1	0
NC	0	10	More	3	More	3	9	MRSA	1	1	More	1	Less	MRSA	1	Less	0	1	1	NC	1	1	0	0	1	More	Less	1	0
NC	0	13	More	3	Less	1	6	MSSA	0	0	Less	0	Medium	MRSA	1	Less	0	0	0	NC	0	0	0	0	1	More	Medium	2	0
NC	0	8	Medium	2	Less	1	6	MRSA	1	0	Less	1	Less	MSSA	0	Medium	0	0	1	NC	1	1	0	0	1	Medium	Less	1	0
NC	0	6	Less	1	Less	1	5	MRSA	1	0	Less	1	Less	MRSA	1	Less	0	0	1	NC	1	1	0	0	0	Less	Less	1	0
NC	0	14	More	3	Medium	2	6	MRSA	1	0	Medium	1	Less	MRSA	1	Less	0	0	1	NC	1	1	0	0	1	More	Less	1	0
NC	0	11	More	3	More	3	11	MRSA	1	0	More	1	Less	MRSA	1	Less	0	0	1	NC	1	1	0	0	1	More	Less	1	0
C	1	10	More	3	Less	1	5	MSSA	0	1	Less	0	More	MRSA	1	Less	1	1	0	C	0	0	0	1	1	More	More	3	1
Nc	0	5	Less	1	More	3	10	MRSA	1	0	More	1	Less	MRSA	1	Less	0	0	1	Nc	1	1	0	0	0	Less	Less	1	0
NC	0	10	More	3	Medium	2	9	MRSA	1	0	Medium	1	Less	MSSA	0	More	0	0	1	NC	1	1	0	0	1	More	Less	1	0
NC	0	11	More	3	More	3	10	MRSA	1	0	More	1	Less	MRSA	1	Less	0	0	1	NC	1	1	0	0	1	More	Less	1	0
NC	0	8	Medium	2	Less	1	5	MRSA	1	0	Less	1	Less	MRSA	1	Less	0	0	1	NC	1	1	0	0	1	Medium	Less	1	0
C	1	8	Medium	2	More	3	10	MRSA	1	0	More	1	Medium	MRSA	1	Less	1	0	1	C	0	1	1	0	1	Medium	Medium	2	1
NC	0	10	More	3	Medium	2	9	MSSA	0	0	Medium	0	Medium	MSSA	0	Less	0	0	0	NC	0	0	0	0	1	More	Medium	2	0
NC	0	10	More	3	Medium	2	8	MSSA	0	0	Medium	0	Medium	MRSA	1	Less	0	0	0	NC	0	0	0	0	1	More	Medium	2	0
C	1	11	More	3	More	3	11	MRSA	1	1	More	1	Medium	MRSA	1	Less	0	1	1	C	0	1	1	0	1	More	Medium	2	0
C	1	11	More	3	More	3	11	MRSA	1	0	More	1	Medium to More	MRSA	1	Medium	0	0	1	C	0	1	1	0	1	More	Medium to More	3	0
C	1	7	Medium	2	Less	1	5	MRSA	1	1	Less	1	Less	MRSA	1	Less	1	1	1	C	0	1	1	0	1	Medium	Less	1	1
NC	0	8	Medium	2	Less	1	5	MRSA	1	0	Less	1	Less	MSSA	0	Medium	0	0	1	NC	1	1	0	0	1	Medium	Less	1	0
NC	0	9	Medium	2	More	3	10	MRSA	1	0	More	1	Less	MRSA	1	Less to Medium	0	0	1	NC	1	1	0	0	1	Medium	Less	1	0
NC	0	10	More	3	More	3	11	MRSA	1	0	More	1	Less	MRSA	1	Medium	0	0	1	NC	1	1	0	0	1	More	Less	1	0
NC	0	10	More	3	Medium	2	7	MSSA	0	0	Medium	0	More	MRSA	1	Medium	0	0	0	NC	0	0	0	0	1	More	More	3	0
NC	0	6	Less	1	Less	1	5	MRSA	1	0	Less	1	Less	MSSA	0	Medium	0	0	1	NC	1	1	0	0	0	Less	Less	1	0
NC	0	11	More	3	Less	1	5	MRSA	1	0	Less	1	Medium	MRSA	1	Less	0	0	1	NC	1	1	0	0	1	More	Medium	2	0
NC	0	8	Medium	2	More	3	10	MRSA	1	0	More	1	Medium	MRSA	1	Medium to More	0	0	1	NC	1	1	0	0	1	Medium	Medium	2	0
NC	0	6	Less	1	Less	1	5	MRSA	1	0	Less	1	Medium	MRSA	1	Medium	0	0	1	NC	1	1	0	0	0	Less	Medium	2	0
NC	0	10	More	3	Less	1	6	MRSA	1	0	Less	1	Less	MRSA	1	Medium to More	0	0	1	NC	1	1	0	0	1	More	Less	1	0
NC	0	12	More	3	More	3	10	MRSA	1	0	More	1	Medium	MRSA	1	Less	0	0	1	NC	1	1	0	0	1	More	Medium	2	0
NC	0	11	More	3	More	3	10	MRSA	1	0	More	1	Medium	MRSA	1	Less	1	0	1	NC	1	1	0	0	1	More	Medium	2	0
NC	0	10	More	3	More	3	10	MSSA	0	0	More	0	Less to Medium	MRSA	1	Less	1	0	0	NC	0	0	0	0	1	More	Less to Medium	2	0
C	1	10	More	3	Medium	2	7	MRSA	1	0	Medium	1	Less	MRSA	1	Less	1	0	1	C	0	1	1	0	1	More	Less	1	0
C	1	7	Medium	2	Medium	2	7	MRSA	1	0	Medium	1	Medium	MSSA	0	Less	1	0	1	C	0	1	1	0	1	Medium	Medium	2	1
NC	0	7	Medium	2	Medium	2	8	MRSA	1	0	Medium	1	Medium	MSSA	0	Less	0	0	1	NC	1	1	0	0	1	Medium	Medium	2	0
NC	0	11	More	3	More	3	10	MSSA	0	0	More	0	Less	MSSA	0	Less	1	0	0	NC	0	0	0	0	1	More	Less	1	0
NC	0	6	Less	1	Medium	2	7	MSSA	0	0	Medium	0	Medium	MSSA	0	Medium	0	0	0	NC	0	0	0	0	0	Less	Medium	2	0
NC	0	7	Medium	2	Less	1	5	MRSA	1	0	Less	1	Less	MSSA	0	More	0	0	1	NC	1	1	0	0	1	Medium	Less	1	0
C	1	9	Medium	2	More	3	10	MRSA	1	1	More	1	Medium	MRSA	1	Less	0	1	1	C	0	1	1	0	1	Medium	Medium	2	1
NC	0	7	Medium	2	Medium	2	9	MRSA	1	0	Medium	1	Medium	MRSA	1	Less	0	0	1	NC	1	1	0	0	1	Medium	Medium	2	0
NC	0	10	More	3	More	3	11	MRSA	1	0	More	1	Less	MRSA	1	Medium	1	0	1	NC	1	1	0	0	1	More	Less	1	0
NC	0	7	Medium	2	Medium	2	7	MSSA	0	0	Medium	0	Medium	MRSA	1	Medium	1	0	0	NC	0	0	0	0	1	Medium	Medium	2	0
NC	0	7	Medium	2	More	3	10	MRSA	1	0	More	1	More	MRSA	1	Medium	0	0	1	NC	1	1	0	0	1	Medium	More	3	0
NC	0	14	More	3	More	3	10	MRSA	1	0	More	1	Medium	MRSA	1	Less	1	0	1	NC	1	1	0	0	1	More	Medium	2	0
NC	0	8	Medium	2	Medium	2	9	MSSA	0	0	Medium	0	Medium to More	MRSA	1	Medium	0	0	0	NC	0	0	0	0	1	Medium	Medium to More	3	0
NC	0	13	Medium	2	More	3	10	MRSA	1	0	More	1	Medium	MRSA	1	Medium	0	0	1	NC	1	1	0	0	1	Medium	Medium	2	0
NC	0	10	More	3	Less	1	5	MRSA	1	0	Less	1	Less	MSSA	0	Less to Medium	0	0	1	NC	1	1	0	0	1	More	Less	1	0
NC	0	10	More	3	Medium	2	8	MRSA	1	0	Medium	1	Less	MRSA	1	Less	0	0	1	NC	1	1	0	0	1	More	Less	1	0
NC	0	7	Medium	2	Medium	2	7	MRSA	1	0	Medium	1	Less to Medium	MRSA	1	Medium	0	0	1	NC	1	1	0	0	1	Medium	Less to Medium	2	0
NC	0	10	More	3	Medium	2	9	MSSA	0	0	Medium	0	Less	MRSA	1	Less	0	0	0	NC	0	0	0	0	1	More	Less	1	0
NC	0	10	More	3	Medium	2	8	MRSA	1	0	Medium	1	Less	MRSA	1	Medium	0	0	1	NC	1	1	0	0	1	More	Less	1	0
NC	0	7	Medium	2	Medium	2	8	MRSA	1	0	Medium	1	Medium	MSSA	0	Less	0	0	1	NC	1	1	0	0	1	Medium	Medium	2	0
NC	0	5	Less	1	Medium	2	9	MSSA	0	0	Medium	0	More	MSSA	0	Medium	0	0	0	NC	0	0	0	0	0	Less	More	3	0
C	1	13	More	3	More	3	10	MRSA	1	0	More	1	Medium	MRSA	1	Less	1	0	1	C	0	1	1	0	1	More	Medium	2	1
NC	0	7	Medium	2	Less	1	5	MSSA	0	0	Less	0	Medium	MRSA	1	Medium	0	0	0	NC	0	0	0	0	1	Medium	Medium	2	0
C	1	8	Medium	2	Medium	2	7	MRSA	1	1	Medium	1	Medium	MRSA	1	Medium	1	1	1	C	0	1	1	0	1	Medium	Medium	2	1
NC	0	8	Medium	2	More	3	11	MRSA	1	0	More	1	Medium	MRSA	1	Less	1	0	1	NC	1	1	0	0	1	Medium	Medium	2	0
NC	0	11	More	3	Less	1	6	MRSA	1	0	Less	1	Medium	MSSA	0	Medium	0	0	1	NC	1	1	0	0	1	More	Medium	2	0
NC	0	12	More	3	Less	1	6	MSSA	0	0	Less	0	Less	MRSA	1	More	0	0	0	NC	0	0	0	0	1	More	Less	1	0
NC	0	10	More	3	Medium	2	8	MSSA	0	1	Medium	0	Medium	MRSA	1	Medium	0	1	0	NC	0	0	0	0	1	More	Medium	2	0
C	1	10	More	3	Less	1	5	MRSA	1	0	Less	1	Less	MRSA	1	Medium	0	0	1	C	0	1	1	0	1	More	Less	1	1
NC	0	10	More	3	More	3	11	MRSA	1	0	More	1	Less	MSSA	0	Medium to More	0	0	1	NC	1	1	0	0	1	More	Less	1	0
NC	0	10	More	3	Medium	2	8	MRSA	1	0	Medium	1	Less	MRSA	1	Less	0	0	1	NC	1	1	0	0	1	More	Less	1	0
C	1	7	Medium	2	More	3	10	MSSA	0	0	More	0	Medium	MSSA	0	Medium	0	0	0	C	0	0	0	1	1	Medium	Medium	2	0
NC	0	8	Medium	2	More	3	12	MSSA	0	0	More	0	Medium	MRSA	1	Medium	0	0	0	NC	0	0	0	0	1	Medium	Medium	2	0
NC	0	8	Medium	2	Medium	2	7	MRSA	1	0	Medium	1	Medium	MRSA	1	Less	0	0	1	NC	1	1	0	0	1	Medium	Medium	2	0
NC	0	10	More	3	Less	1	6	MRSA	1	0	Less	1	Less	MRSA	1	Less	0	0	1	NC	1	1	0	0	1	More	Less	1	0
C	1	9	Medium	2	Medium	2	9	MRSA	1	1	Medium	1	Less	MRSA	1	Less to Medium	0	1	1	C	0	1	1	0	1	Medium	Less	1	0
C	1	7	Medium	2	More	3	11	MSSA	0	0	More	0	Medium	MSSA	0	Less	0	0	0	C	0	0	0	1	1	Medium	Medium	2	0
NC	0	6	Less	1	More	3	10	MSSA	0	0	More	0	Medium	MRSA	1	Less	0	0	0	NC	0	0	0	0	0	Less	Medium	2	0
C	1	9	Medium	2	Medium	2	8	MRSA	1	1	Medium	1	Less	MRSA	1	Medium	0	1	1	C	0	1	1	0	1	Medium	Less	1	0
NC	0	10	More	3	Medium	2	8	MSSA	0	0	Medium	0	Medium	MSSA	0	More	0	0	0	NC	0	0	0	0	1	More	Medium	2	0
NC	0	5	Less	1	Less	1	5	MRSA	1	0	Less	1	Less	MRSA	1	Medium	0	0	1	NC	1	1	0	0	0	Less	Less	1	0
NC	0	10	More	3	More	3	11	MRSA	1	0	More	1	Medium	MSSA	0	Medium	1	0	1	NC	1	1	0	0	1	More	Medium	2	0
NC	0	13	More	3	Less	1	6	MRSA	1	0	Less	1	Medium	MSSA	0	Less	0	0	1	NC	1	1	0	0	1	More	Medium	2	0
NC	0	10	More	3	Less	1	6	MRSA	1	0	Less	1	Less	MRSA	1	Medium	0	0	1	NC	1	1	0	0	1	More	Less	1	0
NC	0	8	Medium	2	Less	1	6	MRSA	1	0	Less	1	Medium	MRSA	1	Medium	1	0	1	NC	1	1	0	0	1	Medium	Medium	2	0
NC	0	9	Medium	2	Less	1	6	MRSA	1	0	Less	1	Less	MRSA	1	Medium	0	0	1	NC	1	1	0	0	1	Medium	Less	1	0
NC	0	13	More	3	Medium	2	7	MRSA	1	0	Medium	1	Medium	MSSA	0	Less	1	0	1	NC	1	1	0	0	1	More	Medium	2	0
NC	0	7	Medium	2	Less	1	6	MSSA	0	0	Less	0	Medium	MRSA	1	Less	0	0	0	NC	0	0	0	0	1	Medium	Medium	2	0
NC	0	10	More	3	Medium	2	9	MSSA	0	0	Medium	0	Medium	MSSA	0	Medium	0	0	0	NC	0	0	0	0	1	More	Medium	2	0
NC	0	6	Less	1	Less	1	5	MSSA	0	0	Less	0	Less	MRSA	1	Less	0	0	0	NC	0	0	0	0	0	Less	Less	1	0
NC	0	7	Medium	2	More	3	10	MRSA	1	0	More	1	Medium to More	MRSA	1	Less	0	0	1	NC	1	1	0	0	1	Medium	Medium to More	3	0
NC	0	10	More	3	More	3	8	MRSA	1	0	More	1	Medium	MRSA	1	Less	1	0	1	NC	1	1	0	0	1	More	Medium	2	0
NC	0	5	Less	1	Less	1	5	MRSA	1	0	Less	1	Less	MSSA	0	Medium	0	0	1	NC	1	1	0	0	0	Less	Less	1	0
C	1	8	Medium	2	Medium	2	10	MRSA	1	1	Medium	1	More	MSSA	0	Medium	1	1	1	C	0	1	1	0	1	Medium	More	3	1
NC	0	10	More	3	More	3	10	MRSA	1	0	More	1	Medium	MRSA	1	Medium	0	0	1	NC	1	1	0	0	1	More	Medium	2	0
C	1	10	More	3	Less	1	6	MSSA	0	0	Less	0	Less	MRSA	1	Less	1	0	0	C	0	0	0	1	1	More	Less	1	0
NC	0	11	More	3	Less	1	5	MRSA	1	1	Less	1	Medium	MSSA	0	Medium	0	1	1	NC	1	1	0	0	1	More	Medium	2	0
NC	0	12	More	3	Medium	2	7	MRSA	1	0	Medium	1	Medium	MRSA	1	Less	0	0	1	NC	1	1	0	0	1	More	Medium	2	0
NC	0	8	Medium	2	Less	1	6	MSSA	0	1	Less	0	Less	MSSA	0	Medium	0	1	0	NC	0	0	0	0	1	Medium	Less	1	0
C	1	8	Medium	2	Less	1	6	MRSA	1	1	Less	1	Less	MSSA	0	Medium	1	1	1	C	0	1	1	0	1	Medium	Less	1	0
NC	0	10	More	3	Medium	2	8	MRSA	1	0	Medium	1	Medium	MRSA	1	Less	0	0	1	NC	1	1	0	0	1	More	Medium	2	0
NC	0	8	Medium	2	More	3	10	MRSA	1	0	More	1	Medium to More	MSSA	0	Medium	0	0	1	NC	1	1	0	0	1	Medium	Medium to More	3	0
NC	0	8	Medium	2	Less	1	5	MSSA	0	0	Less	0	Less	MRSA	1	Medium	1	0	0	NC	0	0	0	0	1	Medium	Less	1	0
NC	0	9	Medium	2	More	3	10	MRSA	1	0	More	1	Medium	MRSA	1	Less	1	0	1	NC	1	1	0	0	1	Medium	Medium	2	0
C	1	7	Medium	2	More	3	12	MRSA	1	0	More	1	Medium to More	MSSA	0	Medium	0	0	1	C	0	1	1	0	1	Medium	Medium to More	3	1
NC	0	10	More	3	Medium	2	7	MRSA	1	0	Medium	1	Medium	MRSA	1	Less	0	0	1	NC	1	1	0	0	1	More	Medium	2	0
NC	0	10	More	3	More	3	11	MRSA	1	0	More	1	Medium	MSSA	0	Less	0	0	1	NC	1	1	0	0	1	More	Medium	2	0
NC	0	13	More	3	More	3	11	MRSA	1	0	More	1	Medium	MRSA	1	Less	0	0	1	NC	1	1	0	0	1	More	Medium	2	0
C	1	8	Medium	2	More	3	11	MRSA	1	0	More	1	Medium	MRSA	1	Medium	0	0	1	C	0	1	1	0	1	Medium	Medium	2	0
NC	0	10	More	3	Less	1	5	MRSA	1	0	Less	1	Less	MRSA	1	Medium	0	0	1	NC	1	1	0	0	1	More	Less	1	0
C	1	7	Medium	2	More	3	10	MRSA	1	1	More	1	Medium to More	MRSA	1	Less	1	1	1	C	0	1	1	0	1	Medium	Medium to More	3	0
C	1	8	Medium	2	More	3	11	MRSA	1	0	More	1	Medium	MRSA	1	Less to Medium	0	0	1	C	0	1	1	0	1	Medium	Medium	2	0
C	1	12	More	3	Medium	2	8	MRSA	1	0	Medium	1	Medium	MRSA	1	Medium	0	0	1	C	0	1	1	0	1	More	Medium	2	1
C	1	7	Medium	2	Medium	2	8	MRSA	1	1	Medium	1	Medium	MRSA	1	Medium	1	1	1	C	0	1	1	0	1	Medium	Medium	2	1
NC	0	9	More	3	More	3	10	MRSA	1	0	More	1	More	MSSA	0	Medium to More	0	0	1	NC	1	1	0	0	1	More	More	3	0
C	1	10	More	3	More	3	11	MSSA	0	0	More	0	Medium	MRSA	1	Less	1	0	0	C	0	0	0	1	1	More	Medium	2	1
NC	0	9	Medium	2	Medium	2	8	MRSA	1	0	Medium	1	Less	MRSA	1	Medium	0	0	1	NC	1	1	0	0	1	Medium	Less	1	0
NC	0	7	medium	2	More	3	10	MRSA	1	0	More	1	More	MRSA	1	Medium	0	0	1	NC	1	1	0	0	1	medium	More	3	0
C	1	10	More	3	Less	1	5	MRSA	1	0	Less	1	Medium	MRSA	1	Medium	0	0	1	C	0	1	1	0	1	More	Medium	2	1
NC	0	10	More	3	More	3	10	MSSA	0	0	More	0	More	MSSA	0	Medium	0	0	0	NC	0	0	0	0	1	More	More	3	0
NC	0	6	Less	1	Less	1	6	MRSA	1	0	Less	1	Medium	MSSA	0	Medium	0	0	1	NC	1	1	0	0	0	Less	Medium	2	0
														MSSA	0	Less
														MRSA	1	Medium to More
														MRSA	1	Medium
														MRSA	1	Less												pig & mrsa
														MRSA	1	More												-0.15587
														MRSA	1	Medium
														MRSA	1	Medium
														MSSA	0	Less	0.0817108						0.163165
										-0.0165461				MRSA	1	Medium												pig & Dna
														MRSA	1	Medium												-0.0153187
														MRSA	1	Medium to More
														MSSA	0	Less	0.132529					0.0843618						pig & hem
										-0.0666252				MRSA	1	Less												0.378322
														MRSA	1	Medium
														MRSA	1	Medium to More
														MSSA	0	Less								0.0713393				pig & dead
								0.0589256						MRSA	1	Medium												0.188267
														MRSA	1	Medium to More
														MRSA	1	Medium					0.0296025
								-0.0244193						MRSA	1	Medium												pig & sepsis
														MRSA	1	Medium												0.079931
														MRSA	1	Medium
														MRSA	1	Less
														MRSA	1	Medium to More												pig & pneum
														MRSA	1	Medium												0.0385758
														MRSA	1	Medium							0.0938905
														MRSA	1	Medium
														MRSA	1	Medium												pig & criticality
														MSSA	0	Less												0.149904
														MRSA	1	Less
														MRSA	1	More
														MSSA	0	Medium
														MRSA	1	Less					-0.00937958
														MRSA	1	More
														MRSA	1	Medium
														MRSA	1	Medium
														MSSA	0	More
														MRSA	1	Medium

## Sheet: Sheet1
ID		Gender	Age	Sample	Organism	Colony Morphology	Gram Stain	Catalase	Oxidase	Coagulase	MSA	Sensitivity Pattern to BenzylPenicillin	Oxacillin	Gentamicin	Ciprofloxacin	Levofloxacin	Erythromycin	Clindamycin	Linezolid	Daptomycin	Teicoplanin	Vancomycin	Tetracycline	Nitrofurantoin	Rifampicin	Trimethoprim/ Sulfamethoxazole	Tigecycline	MDR	XDR	ID	R%	ID	R%	ct	ID			r	ct
p6878		Male	47	Pus	MRSA	Golden-Yellow colonies	GPC in cluster	Positive	Negative	Positive	Positive (yellow)	R	R	I	R	R	S	S	S		S	S	S	S	S	R	S	yes	no	p6878		p6878			p6878			31.25	21.88
p6574		Male	23	Pus	MSSA	White- Golden yellow colonies	GPC in cluster	Positive	Negative	Positive	Positive	R	S	S	R	R	R	S	S	S	S	S	S	S	S	R	S	yes	no	p6574	31.25	p6574	31.25	21.88	p6574			25	21.28
p6994		Male	45	Tissue	MRSA	Golden-Yellow colonies	GPC in cluster	Positive	Negative	Positive	Positive	R	R	S	R	R	S	S	S	S	S	S	S	S	S	S	S	no	no	p6994	25	p6994	25	21.28	p6994			50	19.79
p7070		Male	23	Sputum	MRSA	Golden-Yellow colonies	GPC in cluster	Positive	Negative	Positive	Positive	R	R	R	R	R	R	R	S	S	S	S	S	S	S	R	S	yes	no	p7070	50	p7070	50	19.79	p7070			43.75	22.63
b3624		Female	12	Blood	MSSA	Golden-Yellow colonies	GPC in cluster	Positive	Negative	Positive	Positive	R	S	S	R	R	S	S	S		S	R	S	S	S	R	S	yes	no	b3624		b3624			b3624			43.75	24.14
p7081		Male	10	Pus	MRSA	Golden-Yellow colonies	GPC in cluster	Positive	Negative	Positive	Positive	R	R	R	R	R	R	S	S	S	S	S	S	S	S	R	S	yes	no	p7081	43.75	p7081	43.75	22.63	p7081			53.3	20.92
p7439		Male	5	Pus	MRSA	Golden-Yellow colonies	GPC in cluster	Positive	Negative	Positive	Positive	R	R		R	R	R	R	S	S	S	S	S	S	S	S	S	yes	no	p7439		p7439			p7439			66.66	21.72
p7588		Male	19	Pus	MRSA	Golden-Yellow colonies	GPC in cluster	Positive	Negative	Positive	Positive	R	R	S	R	R	R	S	S	S	S	S	S	S	S	R	S	yes	no	p7588		p7588			p7588			26.66	20.98
p7683		Female	6	Pus	MRSA	Golden-Yellow colonies	GPC in cluster	Positive	Negative	Positive	Positive	R	R	R	R	R	R	S	S	S	S	S	S	S	S	R	S	yes	no	p7683	43.75	p7683	43.75	24.14	p7683			31.25	20.82
p7852		Female	8	Pus	MRSA	Golden-Yellow colonies	GPC in cluster	Positive	Negative	Positive	Positive	R	R	S	R	R	R	R	S		S	S	R	S	S	R	S	yes	no	p7852	53.3	p7852	53.3	20.92	p7852			50	27.45
u9937		Male	50	Urine	MSSA	Golden-Yellow colonies	GPC in cluster	Positive	Negative	Positive	Positive	R	S	S	R	R	R	R	S	S	S	S	R	S	S	R	S	yes	no	u9937		u9937			u9937			46.66	20.41
p7882		Male	23	Pus	MRSA	Golden-Yellow colonies	GPC in cluster	Positive	Negative	Positive	Positive	R	R	R	R	R	R	R	S		S	S	R	S	R	R	S	yes	no	p7882	66.66	p7882	66.66	21.72	p7882			46.66	28.5
p7923		Male	20	Pus	MRSA	Golden-Yellow colonies	GPC in cluster	Positive	Negative	Positive	Positive	R	R	R	R	R	R	R	S	S	S	S	R	S	S	R	S	yes	no	p7923		p7923			p7923			40	25.72
p7925		Female	67	Pus	MRSA	Golden-Yellow colonies	GPC in cluster	Positive	Negative	Positive	Positive	R	R	I	R	R	R	S	S		S	S	S	S	S	S	S	yes	no	p7925	26.66	p7925	26.66	20.98	p7925			25	21.42
p6680		Female	60	Tissue	MSSA	White- Golden yellow colonies	GPC in cluster	Positive	Negative	Positive	Positive	R	S	S	R	R	R	S	S	S	S	S	S	S	S	R	S	yes	no	p6680	31.25	p6680	31.25	20.82	p6680*			25	20.48
p7953		Male	27	Ascitic fluid/ Peritoneal fluid	MRSA	Golden-Yellow colonies	GPC in cluster	Positive	Negative	Positive	Positive	R	R	S	R	R	R	S	S	S	S	S	R	S	R	R	S	yes	no	p7953	50	p7953	50	27.45	p7953			46.66	20.83
p7992		Male	50	Tissue	MRSA	Golden-Yellow colonies	GPC in cluster	Positive	Negative	Positive	Positive	R	R	S	R	R	R	R	S		S	S	S	S	S	R	S	yes	no	p7992	46.66	p7992	46.66	20.41	p7992			43.75	28.35
p8088		Male	44	Pus	MRSA	Golden-Yellow colonies	GPC in cluster	Positive	Negative	Positive	Positive	R	R	I	R	R	R	R	S		S	S	S	S	S	R	S	yes	no	p8088	46.66	p8088	46.66	28.5	p8088			46.66	20.2
p8126		Male	50	Pus	MRSA	Golden-Yellow colonies	GPC in cluster	Positive	Negative	Positive	Positive	R	R	S	R	R	R	R	S		S	I	S	S	S	S	S	yes	no	p8126	40	p8126	40	25.72	p8126			40	22.89
p8303		Male	33	Pus	MSSA	Golden-Yellow colonies	GPC in cluster	Positive	Negative	Positive	Positive	R	S	S	R	R	R	S	S	S	S	S	S	S	S	S	S	yes	no	p8303		p8303			p8303			50	20.61
p8165		Female	21	Pus	MRSA	Golden-Yellow colonies	GPC in cluster	Positive	Negative	Positive	Positive	R	R	S	R	R	S	R	S		R	S	S	S	S	R	S	yes	no	p8165		p8165			p8165			50	21.8
p8530*		Male	27	Pus	MRSA	Golden-Yellow colonies	GPC in cluster	Positive	Negative	Positive	Positive	R	R	R	R	R	R	S	S		S	S	S	S	S	S	S	yes	no	p8530*		p8530*			p8530*			25	21.76
p8364		Male	66	Pus	MRSA	Golden-Yellow colonies	GPC in cluster	Positive	Negative	Positive	Intermediate (Orange)	R	R	S	R	R	R	R	S	S	S	S	S	S	S	R	S	yes	no	p8364		p8364			p8364			25	30.11
b4504		Male	3	Blood	MSSA	Golden-Yellow colonies	GPC in cluster	Positive	Negative	Positive	Positive	R	S	I	R	R	S	S	S	S	S	S	S	S	S	R	S	yes	no	b4504	25	b4504	25	21.42	b4504			37.5	19.73
p8498		Female	37	Pus	MRSA	Golden-Yellow colonies	GPC in cluster	Positive	Negative	Positive	Positive	R	R	S	R	R	S	S	S	S	S	S	S	S	S	S	S	no	no	p8498	25	p8498	25	20.48	p8498			31.25	20.41
p8497		Male	24	Pus	MRSA	Golden-Yellow colonies	GPC in cluster	Positive	Negative	Positive	Positive	R	R	I	R	R	R	R	S		S	S	S	S	S	R	S	yes	no	p8497		p8497			p8497			46.66	20.95
p8522		Male	6 Days	Pus	MRSA	Golden-Yellow colonies	GPC in cluster	Positive	Negative	Positive	Positive	R	R	I	R	R	R	R	S		S	S	S	S	S	R	S	yes	no	p8522	46.66	p8522	46.66	20.83	p8522			31.25	23.96
b4595		Male	9	Blood	MRSA	Golden-Yellow colonies	GPC in cluster	Positive	Negative	Positive	Positive	R	R	I	R	R	R	R	S	S	S	S	S	S	S	R	S	yes	no	b4595		b4595			b4595			50	22.4
p8639		Female	70	Pus	MRSA	Golden-Yellow colonies	GPC in cluster	Positive	Negative	Positive	Positive	R	R	S	R	R	R	R	S		S	S	S	S	S	S	S	yes	no	p8639		p8639			p8639			31.25	20.24
p8693		Female	37	Pus	MRSA	Golden-Yellow colonies	GPC in cluster	Positive	Negative	Positive		R	R	S	R	R	R	R	S	S	S	S	S	S	S	R	S	yes	no	p8693	43.75	p8693	43.75	28.35	p8693			43.75	21.37
					R							BP	O	GEN	CIP	LEV	E	CLIN	LIN	DAP	TEI	VAN	TETRA	NIT	RIF	T/S	TIG					p8877	46.66	20.2	p8877			25	20.78
p8877		Male	17	Pus	MRSA	Golden-Yellow colonies	GPC in cluster	Positive	Negative	Positive	Positive	R	R	I	R	R	R	R	S		S	S	S	S	S	R	S	yes	no	p8877	46.66	u11420	40	22.89	u11420			40	19.46
u11420		Male	24	Urine	MRSA	Golden-Yellow colonies	GPC in cluster	Positive	Negative	Positive	Positive	R	R	S	R	R	R	R	S		S	I	S	S	S	S	S	yes	no	u11420	40	p8945	50	20.61	p8945			31.25	20.83
p8945		Female	62	Pus	MSSA	Golden-Yellow colonies	GPC in cluster	Positive	Negative	Positive	Positive	R	S	R	R	R	R	R	S	S	S	S	R	S	S	R	S	yes	no	p8945	50	p8946	50	21.8	p8946			43.75	22.16
p8946		Male	57	Pus	MSSA	Golden-Yellow colonies	GPC in cluster	Positive	Negative	Positive	Positive	R	S	R	R	R	R	R	S	S	S	S	R	S	S	R	S	yes	no	p8946	50	p8947	25	21.76	p8947			43.75	23.03
p8947		Male	9	Pus	MSSA	Golden-Yellow colonies	GPC in cluster	Positive	Negative	Positive	Positive	R	S	S	R	R	S	S	S	S	S	S	S	S	S	R	S	yes	no	p8947	25	p8962	25	30.11	p8962			18.75	20.52
p8962		Female	56	Pus	MSSA	Golden-Yellow colonies	GPC in cluster	Positive	Negative	Positive	Positive	R	S	S	R	R	S	S	S	S	S	S	S	S	S	R	S	yes	no	p8962	25	b4911	37.5	19.73	b4911			31.25	21.13
b4911		Female	44	Blood	MSSA	Golden-Yellow colonies	GPC in cluster	Positive	Negative	Positive	Positive	R	S	R	R	R	S	S	S	S	S	S	R	S	S	R	S	yes	no	b4911	37.5	p9026			p9026			40	22.51
p9026		Female	74	Pus	MRSA	Golden-Yellow colonies	GPC in cluster	Positive	Negative	Positive	Positive	R	R	R	R	R	R	S	S	S	S	S	S	S	S	S	S	yes	no	p9026		u11480	31.25	20.41	u11480			46.66	27.95
u11480		Male	28 days	Urine	MRSA	Golden-Yellow colonies	GPC in cluster	Positive	Negative	Positive	Positive	R	R	S	R	R	R	S	S	S	S	S	S	S	S	S	S	yes	no	u11480	31.25	p9135	46.66	20.95	p9135			31.25	24.03
p9135		Male	5	Pus	MRSA	Golden-Yellow colonies	GPC in cluster	Positive	Negative	Positive	Positive	R	R	S	R	R	R	S	S		S	S	S	S	R	R	S	yes	no	p9135	46.66	p9158			p9158			31.25	25
p9158		Male	30	Pus	MRSA	Golden-Yellow colonies	GPC in cluster	Positive	Negative	Positive	Positive	R	R	S	R	R	R	R	S		S	S	S	S	S	R	S	yes	no	p9158		p9358			p9358			26.66	21.33
p9358		Male	26	Pus	MRSA	Golden-Yellow colonies	GPC in cluster	Positive	Negative	Positive	Positive	R	R	R	R	R	R	S	S	S	S	S	S	S	S	R	S	yes	no	p9358		p9263			p9263			46.66	20.48
p9263		Male	39	Pus	MRSA	Golden-Yellow colonies	GPC in cluster	Positive	Negative	Positive	Positive	R	R	R	R	R	R	S	S	S	S	S	S	S	S	S	S	yes	no	p9263		b5221	31.25	23.96	b5221			60	21.71
b5221		Male	36	Blood	MRSA	Golden-Yellow colonies	GPC in cluster	Positive	Negative	Positive	Positive	R	R	I	R	R	S	S	S	S	S	S	S	S	S	R	S	yes	no	b5221	31.25	b5347	50	22.4	b5347			37.5	21.68
b5347		Male	17	Blood	MRSA	Golden-Yellow colonies	GPC in cluster	Positive	Negative	Positive	Positive	R	R	R	R	R	R	R	S	S	S	S	S	S	S	R	S	yes	no	b5347	50	b5279			b5279			31.25	19.53
b5279		Female	60	Blood	MSSA	Golden-Yellow colonies	GPC in cluster	Positive	Negative	Positive	Positive	R	R	I	R	R	I	S	S	S	S	S	S	S	S	S	S	no	no	b5279		b4704	31.25	20.24	b4704*			64.28	20.51
b4704		Male	28	Blood	MRSA	White- Golden yellow colonies	GPC in cluster	Positive	Negative	Positive	Positive	R	R	S	R	R	S	S	S	S	S	S	S	S	S	R	S	yes	no	b4704	31.25	b5163			b5163			56.25	21.17
b5163		Male	14	Blood	MRSA	White- Golden yellow colonies	GPC in cluster	Positive	Negative	Positive	Positive	R	R	S	R	R	S	S	S	S	S	S	S	S	S	R	S	yes	no	b5163		p34			p34			43.75	22.2
p34		Male	29	Pus	MRSA	Golden-Yellow colonies	GPC in cluster	Positive	Negative	Positive	Positive	R	R	R	R	R	S	S	S		S	S	S	S	S	R	S	yes	no	p34		p70	43.75	21.37	p70			18.75	24.19
p70		Female	69	Pus	MRSA	Golden-Yellow colonies	GPC in cluster	Positive	Negative	Positive	Positive	R	R	I	R	R	R	R	S	S	S	S	S	S	S	R	S	yes	no	p70	43.75	b27	25	20.78	b27			50	21.59
b27		Female	9	Blood	MSSA	Golden-Yellow colonies	GPC in cluster	Positive	Negative	Positive	Positive	R	S	I	R	R	S	S	S	S	S	S	S	S	S	R	S	yes	no	b27	25	p105	n		p105			18.75	21.17
p105		Male	80	Sputum	MSSA	Golden-Yellow colonies	GPC in cluster	Positive	Negative	Positive	Positive	R	R	R	R	R	R	R	S		S	S	S	S	S	R	S	yes	no	p105	n	b5192	n		b5192			25	19.15
b5192		Female	62	Blood	MRSA	White- Golden yellow colonies	GPC in cluster	Positive	Negative	Positive	Positive	R	R	R	R	R	R	R	S	S	S	S	R	S	R	S	S	yes	no	b5192	n	b6573*	n		b6573*			50	18.89
b6573*		Female	64	Blood	MRSA	Golden-Yellow colonies	GPC in cluster	Positive	Negative	Positive	Positive	R	R	S	R	R	S	S	S	S	S	S	S	S	S	R	S	yes	no	b6573*	n	b6619*	n		b6619*			25	22.29
b6619*		Female	21	Blood	MRSA	Golden-Yellow colonies	GPC in cluster	Positive	Negative	Positive	Positive	R	R	R	R	R	R	S	S	S	S	S	R	S	S	S	S	yes	no	b6619*	n	b54			b54			43.75	21
					R							BP	O	GEN	CIP	LEV	E	CLIN	LIN	DAP	TEI	VAN	TETRA	NIT	RIF	T/S	TIG					b6664	40	19.46	b6664*			25	20.61
b54		Male	18 Days	Blood	MRSA	Golden-Yellow colonies	GPC in cluster	Positive	Negative	Positive	Positive	R	R	S	R	R	R	R	S		S	S	S	S	S	R	S	yes	no	b54		p194	31.25	20.83	p194			31.25	22.96
b6664		Female	57	Blood	MSSA	Golden-Yellow colonies	GPC in cluster	Positive	Negative	Positive	Positive	R	S	R	R	R	S	S	S		S	S	R	S	S	R	S	yes	no	b6664	40	b264	43.75	22.16	b264			46.66	19.69
p194		Male	37	Conjunctival swab	MRSA	Golden-Yellow colonies	GPC in cluster	Positive	Negative	Positive	Positive	R	R	I	R	R	R	S	S	S	S	S	S	S	S	S	S	yes	no	p194	31.25	p295	43.75	23.03	p295			37.5	18.66
b264		Male	13 Days	Blood	MRSA	Golden-Yellow colonies	GPC in cluster	Positive	Negative	Positive	Positive	R	R	S	R	R	R	R	S	S	S	S	S	S	S	R	S	yes	no	b264	43.75	u284			u284			37.5	21.85
p295		Male	36	Pus	MRSA	Golden-Yellow colonies	GPC in cluster	Positive	Negative	Positive	Positive	R	R	I	R	R	R	R	S	S	S	S	S	S	S	R	S	yes	no	p295	43.75	p348			p348			37.5	22.27
u284		Male	12	Urine	MSSA	Golden-Yellow colonies	GPC in cluster	Positive	Negative	Positive	Positive	R	S	S	R	R	S	S	S	S	S	S	S	S	S	S	S	no	no	u284		p405	18.75	20.52	p405			37.5	22.59
p348		Male	24	Pus	MRSA	Golden-Yellow colonies	GPC in cluster	Positive	Negative	Positive	Positive	R	R	R	R	R	S	S	S	S	S	S	S	S	S	R	S	yes	no	p348		p473	31.25	21.13	p473			25	20.76
p405		Female	54	Pus	MSSA	White- Golden yellow colonies	GPC in cluster	Positive	Negative	Positive	Positive	R	S	S	R	R	S	S	S	S	S	S	S	S	S	S	S	no	no	p405	18.75	p496	40	22.51	p496			50	19.69
p473		Male	69	Tissue	MRSA	Golden-Yellow colonies	GPC in cluster	Positive	Negative	Positive	Positive	R	R	I	R	R	S	S	S	S	S	S	S	S	S	R	S	yes	no	p473	31.25	p502	46.66	27.95	p502			33.33	23.15
p496		Male	19	Pus	MRSA	Golden-Yellow colonies	GPC in cluster	Positive	Negative	Positive	Positive	R	R	R	R	R	I	S	S		S	S	S	S	S	R	S	yes	no	p496	40	p688	31.25	24.03	p688			31.25	19.9
p502		Female	11	Tissue	MRSA	Golden-Yellow colonies	GPC in cluster	Positive	Negative	Positive	Positive	R	R	I	R	R	R	R	S		S	S	S	S	S	R	S	yes	no	p502	46.66	P798	31.25	25	P798			31.25	20.95
p688		Female	70	Pus	MRSA	Golden-Yellow colonies	GPC in cluster	Positive	Negative	Positive	Positive	R	R	S	R	R	R	S	S	S	S	S	S	S	S	S	S	yes	no	p688	31.25	p828			p828			37.5	21.53
P798		Female	46	Pus	MSSA	Golden-Yellow colonies	GPC in cluster	Positive	Negative	Positive	Positive	R	R	S	R	R	S	S	S	S	S	S	S	S	S	R	S	yes	no	P798	31.25	P997			P997			37.5	19.71
p828		Male	75	Pus	MRSA	Golden-Yellow colonies	GPC in cluster	Positive	Negative	Positive	Positive	R	R	S	R	R	I	S	S	S	S	S	R	S	S	R	S	yes	no	p828		p1028	26.66	21.33	p1028			18.75	19.31
P997		Male	2	Pus	MRSA	Golden-Yellow colonies	GPC in cluster	Positive	Negative	Positive	Positive	R	R	R	R	R	R	R	S		S	S	S	S	S	R	S	yes	no	P997		p1032	46.66	20.48	p1032			25	22.06
p1028		Male	38	Pus	MSSA	Golden-Yellow colonies	GPC in cluster	Positive	Negative	Positive	Positive	R	S	S	R	R	I	S	S		S	S	S	S	S	R	S	yes	no	p1028	26.66	p1119			p1119			33.33	21.29
					R							BP	O	GEN	CIP	LEV	E	CLIN	LIN	DAP	TEI	VAN	TETRA	NIT	RIF	T/S	TIG					p1026			p1026			25	19.57
p1032		Male	33	Pus	MRSA	Golden-Yellow colonies	GPC in cluster	Positive	Negative	Positive	Positive	R	R	S	R	R	R	R	S		S	S	S	S	S	R	S	yes	no	p1032	46.66	b664			b664			37.5	21.38
p1119		Male	57	Pus	MSSA	Golden-Yellow colonies	GPC in cluster	Positive	Negative	Positive	Positive	R	S	S	R	R	R	R	S	S	S	S	S	S	S	S	S	yes	no	p1119		b873	60	21.71	b873			43.75	22.61
p1026		Female	40	Pus	MSSA	Golden-Yellow colonies	GPC in cluster	Positive	Negative	Positive	Positive	R	R	S	R	R	I	R	S	S	S	S	S	S	S	R	S	yes	no	p1026		p1363			p1363			50	19.93
b664		Female	4	Blood	MRSA	Golden-Yellow colonies	GPC in cluster	Positive	Negative	Positive	Positive	R	R	S	R	R	R	R	S	S	S	S	S	S	S	S	S	yes	no	b664		p1518	37.5	21.68	p1518			31.25	19.98
b873		Male	24	Blood	MRSA	White-Golden yellow colonies	GPC in cluster	Positive	Negative	Positive	Positive	R	R	R	R	R	R	R	S	S	S	S	S	S	R	R		yes	no	b873	60	u1796	31.25	19.53	u1796			53.33	18.77
p1363		Female	50	Pus	MRSA	Golden-Yellow colonies	GPC in cluster	Positive	Negative	Positive	Positive	R	R	S	R	R	I	R	S	S	S	S	R	S	S	R	S	yes	no	p1363		b1021			b1021			43.75	19.14
p1518		Female	46	Pus	MSSA	Golden-Yellow colonies	GPC in cluster	Positive	Negative	Positive	Positive	R	S	R	R	R	R	S	S	S	S	S	S	S	R	S	S	yes	no	p1518	37.5	p1586	64.28	20.51	p1586			31.25	19.76
u1796		Female	33	Urine	MRSA	Golden-Yellow colonies	GPC in cluster	Positive	Negative	Positive	Positive	R	R	I	R	R	R	S	S	S	S	S	S	S	S	S	S	yes	no	u1796	31.25	p1630	56.25	21.17	p1630			31.25	21.42
b1021		Female	45	Blood	MSSA	Golden-Yellow colonies	GPC in cluster	Positive	Negative	Positive	Positive	R	S	S	S	S	S	S	S		S	S	S	S	S	R	S	no	no	b1021		p1683	43.75	22.2	p1683			43.75	20.39
p1586		Male	25	Pus	MRSA	Golden-Yellow colonies	GPC in cluster	Positive	Negative	Positive	Positive	R	R	R	R	R	R	R	S		S	S	R	S	R	S		yes	no	p1586	64.28	P1724			P1724			20	20.42
p1630		Male	65	Pus	MRSA	Golden-Yellow colonies	GPC in cluster	Positive	Negative	Positive	Positive	R	R	R	R	R	R	R	S	S	S	S	S	S	R	R	S	yes	no	p1630	56.25	P1732	18.75	24.19	P1732			31.25	20.7
p1683		Female	49	Pus	MRSA	Golden-Yellow colonies	GPC in cluster	Positive	Negative	Positive	Positive	R	R	R	R	R	R	S	S	S	S	S	S	S	S	R	S	yes	no	p1683	43.75	p1869			p1869			25	24.37
P1724		Female	52	BAL	MSSA	Golden-Yellow colonies	GPC in cluster	Positive	Negative	Positive	Positive	R	S	R	R	R	R	S	S		S	S	S	S	S	S	S	yes	no	P1724		b1346	50	21.59	b1346			37.5	20.31
P1732		Male	44	Pus	MSSA	Golden-Yellow colonies	GPC in cluster	Positive	Negative	Positive	Positive	R	S	S	R	R	S	S	S	S	S	S	S	S	S	S	S	no	no	P1732	18.75	p2150			p2150			66.66	21.6
p1869		Female	42	Pus	MRSA	Golden-Yellow colonies	GPC in cluster	Positive	Negative	Positive	Positive	R	R	S	R	R	R	S	S	S	S	S	R	S	S	R	S	yes	no	p1869		p2225			p2225			18.75	19.9
b1346		Female	16	Blood	MRSA	Golden-Yellow colonies	GPC in cluster	Positive	Negative	Positive	Positive	R	R	R	R	R	R	R	S	S	S	S	S	S	S	R	S	yes	no	b1346	50	p2267	18.75	21.17	p2267			50	23.29
p2150		Male	35	Pus	MSSA	Golden-Yellow colonies	GPC in cluster	Positive	Negative	Positive	Positive	R	S	S	R	R	R	R	S	S	S	S	S	S	S	R	S	yes	no	p2150		p2271	25	19.15	p2271
p2225		Male	24	Pus	MRSA	White- Golden yellow colonies	GPC in cluster	Positive	Negative	Positive	Positive	R	R	R	R	R	R	S	S	S	S	S	S	S	S	R	S	yes	no	p2225		b1471	50	18.89	b1471
p2267		Male	50	Pus	MSSA	Golden-Yellow colonies	GPC in cluster	Positive	Negative	Positive	Positive	R	S	S	R	R	S	S	S	S	S	S	S	S	S	S	S	no	no	p2267	18.75	p2284	25	22.29	p2284
p2271		Male	57	Pus	MSSA	Golden-Yellow colonies	GPC in cluster	Positive	Negative	Positive	Positive	R	S	S	R	R	R	S	S	S	S	S	S	S	S	S	S	yes	no	p2271	25	p2315	43.75	21	p2315
b1471		Male	24	Blood	MRSA	Golden-Yellow colonies	GPC in cluster	Positive	Negative	Positive	Positive	R	R	R	R	R	R	R	S	S	S	S	S	S	S	R	S	yes	no	b1471	50	U2753			U2753
p2284		Female	10	Pus	MSSA	Golden-Yellow colonies	GPC in cluster	Positive	Negative	Positive	Positive	R	S	S	R	R	S	S	S	S	S	S	R	S	S	S	S	yes	no	p2284	25	p2308	25	20.61	p2308
p2315		Male	61	Pus	MRSA	Golden-Yellow colonies	GPC in cluster	Positive	Negative	Positive	Positive	R	R	I	R	R	R	R	S	S	S	S	R	S	S	S	S	yes	no	p2315	43.75	p2357			p2357
U2753		Male	33	Urine	MRSA	White colonies	GPC in cluster	Positive	Negative	Positive	Positive	R	R	S	R	R	I	S	S	S	S	S	R	S	S	R	S	yes	no	U2753		p2379	31.25	22.96	p2379
p2308		Female	46	Tissue	MSSA	Golden-Yellow colonies	GPC in cluster	Positive	Negative	Positive	Positive	R	S	S	R	R	S	S	S	S	S	S	S	S	S	R	S	yes	no	p2308	25	p2416			p2416
p2357		Male	22	Pus	MRSA	White colonies	GPC in cluster	Positive	Negative	Positive	Positive	R	R	R	R	R	S	R	R	S	S	S	R	S	S	R	S	yes	no	p2357		b1733	46.66	19.69	b1733
p2379		Male	71	Pus	MSSA	Golden-Yellow colonies	GPC in cluster	Positive	Negative	Positive	Positive	R	S	S	R	R	R	S	S	S	S	S	S	S	S	R	S	yes	no	p2379	31.25	p2625	37.5	18.66	p2625
p2416		Female	58	Pus	MRSA	Golden-Yellow colonies	GPC in cluster	Positive	Negative	Positive	Positive	R	R	R	R	R	R	R	S	S	S	S	S	S	S	R	S	yes	no	p2416		p2737	n		p2737
b1733		Male	12	Blood	MRSA	Golden-Yellow colonies	GPC in cluster	Positive	Negative	Positive	Positive	R	R	R	R	R	I	S	S		S	S	R	S	S	R	S	yes	no	b1733	46.66	p2738	n		p2738
p2625		Male	34	Pus	MRSA	Golden-Yellow colonies	GPC in cluster	Positive	Negative	Positive	Positive	R	R	S	R	R	S	S	S	S	S	S	R	S	S	R	S	yes	no	p2625	37.5	p2806			p2806
p2737		Female	42	Pus	MRSA	Golden-Yellow colonies	GPC in cluster	Positive	Negative	Positive	Positive	R	R	S	R	R	R	S	S	S	S	S	R	S	S	R	S	yes	no	p2737	n	p2823	37.5	21.85	p2823
					R							BP	O	GEN	CIP	LEV	E	CLIN	LIN	DAP	TEI	VAN	TETRA	NIT	RIF	T/S	TIG					p2796			p2796
p2738		Female	1 month	Pus	MRSA	Golden-Yellow colonies	GPC in cluster	Positive	Negative	Positive	Positive	R	R	S	R	R	R	S	S	S	S	S	S	S	S	R	S	yes	no	p2738	n	p2902			p2902
p2806		Male	85	Pus	MRSA	Golden-Yellow colonies	GPC in cluster	Positive	Negative	Positive	Positive	R	R	S	R	R	R	R	S	S	S	S	S	S	S	S	S	yes	no	p2806		p2929			p2929
p2823		Male	25	Bandage contact lens	MRSA	Golden-Yellow colonies	GPC in cluster	Positive	Negative	Positive	Positive	R	R	R	R	R	R	S	S	S	S	S	S	S	S	S	S	yes	no	p2823	37.5	p2930	37.5	22.27	p2930
p2796		Male	75	Pus	MSSA	Golden-Yellow colonies	GPC in cluster	Positive	Negative	Positive	Positive	S	S	S	S	S	S	S	S	S	S	S	S	S	S	S	S	no	no	p2796		b1897			b1897
p2902		Female	28	Pus	MRSA	White- Golden yellow colonies	GPC in cluster	Positive	Negative	Positive	Positive	R	R	S	R	R	R	R	S	S	S	S	S	S	S	R	S	yes	no	p2902		p3241	37.5	22.59	p3241
p2929		Female	45	Pus	MRSA	Golden-Yellow colonies	GPC in cluster	Positive	Negative	Positive	Positive	R	R	S	R	R	R	R	S	S	S	S	S	S	S	S	S	yes	no	p2929		p3269	25	20.76	p3269
p2930		Male	56	Conjunctival swab	MRSA	Golden-Yellow colonies	GPC in cluster	Positive	Negative	Positive	Positive	R	R	I	R	R	R	R	S	S	S	S	S	S	S	S	S	yes	no	p2930	37.5	p3510			p3510
b1897		Male	49	Blood	MRSA	Golden-Yellow colonies	GPC in cluster	Positive	Negative	Positive	Positive	R	R	S	R	R	R	R	S	S	S	S	S	S	S	S	S	yes	no	b1897		p3511	50	19.69	p3511
p3241		Female	21	Pus	MSSA	Golden-Yellow colonies	GPC in cluster	Positive	Negative	Positive	Positive	R	R	S	R	R	R	R	S	S	S	S	S	S	S	S	S	yes	no	p3241	37.5	p3513			p3513
p3269		Male	62	Pus	MSSA	Golden-Yellow colonies	GPC in cluster	Positive	Negative	Positive	Positive	R	S	S	R	R	S	S	S	S	S	S	S	S	S	R	S	yes	no	p3269	25	P3488			P3488
p3510		Male	4	Pus	MSSA	White colonies	GPC in cluster	Positive	Negative	Positive	Positive	R	S	S	R	R	S	R	S	S	S	I	S	S	S	R	S	yes	no	p3510		b6705	33.33	23.15	b6705
p3511		Male	36	Pus	MRSA	Golden-Yellow colonies	GPC in cluster	Positive	Negative	Positive	Positive	R	R	R	R	R	R	R	S	S	S	S	S	S	S	R	S	yes	no	p3511	50	P3694	31.25	19.9	P3694
p3513		Female	16	BAL	MRSA	Golden-Yellow colonies	GPC in cluster	Positive	Negative	Positive	Positive	R	R	S	R	R	I	S	S	S	S	S	S	S	S	S	S	no	no	p3513		P3895	31.25	20.95	P3895
P3488		Male	58	Pus	MRSA	White colonies	GPC in cluster	Positive	Negative	Positive	Positive	R	R	S	R	R	R	R	S		S	S	S	S	S	R	S	yes	no	P3488		b2670			b2670
b6705		Female	61	Blood	MRSA	Golden-Yellow colonies	GPC in cluster	Positive	Negative	Positive	Positive	R	R	I	R	R	R	S	S		S	S	S	S	S	S	S	yes	no	b6705	33.33	b3968	37.5	21.53	b3968
P3694		Male	38	Pus	MRSA	Golden-Yellow colonies	GPC in cluster	Positive	Negative	Positive	Positive	R	R	I	R	R	R	S	S	S	S	S	S	S	S	S	S	yes	no	P3694	31.25	p4075			p4075
P3895		Male	32	Pus	MRSA	Golden-Yellow colonies	GPC in cluster	Positive	Negative	Positive	Positive	R	R	S	R	R	S	S	S	S	S	S	S	S	S	R	S	yes	no	P3895	31.25	p4079	37.5	19.71	p4079
b2670		Female	73	Blood	MSSA	White- Golden yellow colonies	GPC in cluster	Positive	Negative	Positive	Positive	R	S	S	R	R	S	S	S	S	S	S	S	S	S	S	S	no	no	b2670		b7573	18.75	19.31	b7573*
b3968		Male	26	Blood	MRSA	Golden-Yellow colonies	GPC in cluster	Positive	Negative	Positive	Positive	R	R	R	R	R	S	R	S	S	S	S	S	S	S	S	S	yes	no	b3968	37.5	p3961			p3961
p4075		Female	22	Pus	MRSA	Golden-Yellow colonies	GPC in cluster	Positive	Negative	Positive	Positive	R	R	I	R	R	I	R	S	S	S	S	S	S	S	R	S	yes	no	p4075		P3984	25	22.06	P3984
p4079		Male	43	Pus	MRSA	Golden-Yellow colonies	GPC in cluster	Positive	Negative	Positive	Positive	R	R	R	R	R	R	S	S	S	S	S	S	S	S	S	S	yes	no	p4079	37.5	p8499*			p8499*
b7573		Male	35	Blood	MSSA	Golden-Yellow colonies	GPC in cluster	Positive	Negative	Positive	Positive	R	S	S	R	R	S	S	S	S	S	S	S	S	S	S	S	no	no	b7573	18.75	b2968			b2969
p3961		Female	70	ET	MRSA	Golden-Yellow colonies	GPC in cluster	Positive	Negative	Positive	Positive	R	R	R	R	R	R	R	S	S	S	S	R	S	R	S		yes	no	p3961		b3021	33.33	21.29	b3021
P3984		Male	76	Pus	MRSA	Golden-Yellow colonies	GPC in cluster	Positive	Negative	Positive	Positive	R	R	I	R	R	S	S	S	S	S	S	S	S	S	S	S	no	no	P3984	25	b9400*	25	19.57	b9400*
p8499*		Female	33	Pus	MRSA	Golden-Yellow colonies	GPC in cluster	Positive	Negative	Positive	Positive	R	R	I	R	R	R	R	R	S	S	S	S	S	R	R	S	yes	no	p8499*		p4492	37.5	21.38	p4492
b2968		Male	38	Blood	MSSA	White colonies	GPC in cluster	Positive	Negative	Positive	Positive	R	S	S	R	R	S	S	S	S	S	S	S	S	S	S	S	no	no	b2968		p4434	43.75	22.61	p4434
b3021		Female	38	Blood	MRSA	Golden-Yellow colonies	GPC in cluster	Positive	Negative	Positive	Positive	R	R	S	R	R	R	S	S	S	S	S	S	S	S	S	S	yes	no	b3021	33.33	p4486	50	19.93	p4486
b9400*		Male	70	Blood	MRSA	Golden-Yellow colonies	GPC in cluster	Positive	Negative	Positive	Positive	R	R	S	R	R	S	S	S	S	S	S	S	S	S	S	S	no	no	b9400*	25	b3076	31.25	19.98	b3076
p4492		Female	60	Pus	MRSA	Golden-Yellow colonies	GPC in cluster	Positive	Negative	Positive	Positive	R	R	R	R	R	R	S	S	S	S	S	S	S	S	S	S	yes	no	p4492	37.5	p4656	53.33	18.77	p4656
p4434		Male	35	Epidermal Tissue	MRSA	White- Golden yellow colonies	GPC in cluster	Positive	Negative	Positive	Positive	R	R	S	R	R	R	R	S	S	S	S	R	S	S	S	S	yes	no	p4434	43.75	b9470	43.75	19.14	b9470*
p4486		Male	66	Pus	MRSA	Golden-Yellow colonies	GPC in cluster	Positive	Negative	Positive	Positive	R	R	R	R	R	R	R	S	S	S	S	S	S	S	R	S	yes	no	p4486	50	p4753	31.25	19.76	p4753
					R							BP	O	GEN	CIP	LEV	E	CLIN	LIN	DAP	TEI	VAN	TETRA	NIT	RIF	T/S	TIG					u6041			u6041
b3076		Male	37	Blood	MRSA	Golden-Yellow colonies	GPC in cluster	Positive	Negative	Positive	Positive	R	R	I	R	R	R	S	S	S	S	S	S	S	S	S	S	yes	no	b3076	31.25	p5018	31.25	21.42	p5018
p4656		Female	15	Pus	MRSA	White- Golden yellow colonies	GPC in cluster	Positive	Negative	Positive	Positive	R	R	R	R	R	R	R	S		S	S	S	S	S	R	S	yes	no	p4656	53.33	b3417			b3417
b9470		Male	66	Blood	MRSA		GPC in cluster	Positive	Negative	Positive	Positive	R	R	S	R	R	R	R	S	S	S	S	S	S	S	R	S	yes	no	b9470	43.75	p5205			p5205
p4753		Female	60	TT	MRSA	Golden-Yellow colonies	GPC in cluster	Positive	Negative	Positive	Positive	R	R	S	R	R	S	S	S	S	S	S	S	S	S	R	S	yes	no	p4753	31.25	p5315	43.75	20.39	p5315
u6041		Female	27	Urine	MRSA	Golden-Yellow colonies	GPC in cluster	Positive	Negative	Positive	Positive	R	R	S	R	R	R	R	S	S	S	S	S	S	S	S	S	yes	no	u6041		u6774			u6774
p5018		Male	40	Pus	MRSA	White- Golden yellow colonies	GPC in cluster	Positive	Negative	Positive	Positive	R	R	S	R	R	S	S	S	S	S	S	S	S	S	R	S	yes	no	p5018	31.25	p5799	20	20.42	p5799
b3417		Male	18	Blood	MRSA	White- Golden yellow colonies	GPC in cluster	Positive	Negative	Positive	Positive	R	R	R	R	R	R	S	S	S	S	S	S	S	S	R	S	yes	no	b3417		p5885	31.25	20.7	p5885
p5205		Male	19	Pus	MSSA	White- Golden yellow colonies	GPC in cluster	Positive	Negative	Positive	Positive	R	S	S	R	R	R	S	S	S	S	S	S	S	S	R	S	yes	no	p5205		p6014	25	24.37	p6014
p5315		Male	32	Pus	MRSA	White- Golden yellow colonies	GPC in cluster	Positive	Negative	Positive	Positive	R	R	S	R	R	R	R	S	S	S	S	S	S	S	R	S	yes	no	p5315	43.75	p6073	37.5	20.31	p6073
u6774		Female	22	Urine	MRSA	White- Golden yellow colonies	GPC in cluster	Positive	Negative	Positive	Positive	R	R	S	R	R	R	S	S	S	S	S	S	S	S	S	S	yes	no	u6774		b4348	66.66	21.6	b4348
p5799		Female	58	Pus	MSSA	Golden-Yellow colonies	GPC in cluster	Positive	Negative	Positive	Positive	R	S	S	R	R	S	S	S		S	S	S	S	S	S	S	no	no	p5799	20	p6192	18.75	19.9	p6192
p5885		Female		Pus	MRSA	Golden-Yellow colonies	GPC in cluster	Positive	Negative	Positive	Positive	R	R	I	R	R	S	S	S	S	S	S	S	S	S	R	S	yes	no	p5885	31.25	p6452	50	23.29	p6452
p6014		Male	22	Pus	MRSA	Golden-Yellow colonies	GPC in cluster	Positive	Negative	Positive	Positive	R	R	S	R	R	S	S	S	S	S	S	S	S	S	S	S	no	no	p6014	25
p6073		Male	63	BAL	MRSA	Golden-Yellow colonies	GPC in cluster	Positive	Negative	Positive	Positive	R	R	S	R	R	R	R	S	S	S	S	S	S	S	S	S	yes	no	p6073	37.5
b4348		Male	65	Blood	MRSA	Golden-Yellow colonies	GPC in cluster	Positive	Negative	Positive	Positive	R	R	R	R	R	R	R	S		S	S	R	S	R	R	S	yes	no	b4348	66.66
p6192		Male	16	Pus	MSSA	Golden-Yellow colonies	GPC in cluster	Positive	Negative	Positive	Positive	R	S	S	R	R	S	S	S	S	S	S	S	S	S	S	S	no	no	p6192	18.75
p6452		Male	38	Pus	MRSA	Golden-Yellow colonies	GPC in cluster	Positive	Negative	Positive	Positive	R	R	R	R	R	R	R	S	S	S	S	S	S	S	R	S	yes	no	p6452	50

## Sheet: Sheet6
ID	Age	MRSA/MSSA	Clinical Features	Discharge	Dnase	Hemolysis
b3624	12	MSSA	Obstructive uropathy	Stable	More	Less
b4504	3	MSSA	B cell ALL	Stable	More	Medium
b4595	9	MRSA	Rheumatic Heart disease	DOPR	More	More
b4911	44	MSSA	Rhinoorbital mucormycosis	Stable	More	Medium
b5221	36	MRSA	Glomerulonephritis	Stable	More	Medium
b5347	17	MRSA	Disseminated septic arthritis	Stable	More	More
b5279	60	MSSA	Sepsis	Stable	More	More
b4704	28	MRSA	LRTI septic shock	LAMA	More	Medium
b5163	14	MRSA	Septic shock, Respiratory failure(RF)	Death	Medium	Medium
b27	9	MSSA	Septic arthritis	Stable	More	More
b5192	62	MRSA	Cancer of esophagus	Stable	Medium	Less
b6573*	64	MRSA	CA-Pneumonia, RF	Death	Medium	More
b6619*	21	MRSA	Body vesicles, polyarthralgia	LAMA	Less	Medium
b54	1 month	MRSA	Disseminated MRSA sepsis, multiple abscess	Stable	More	More
b6664	57	MSSA	Sepsis, Valvular heart disease, Chronic kidney disease	Stable	Medium	Medium
b264	27 days	MRSA	Septic arthritis, LONS(MRSA)	Stable	More	More
b664	4	MRSA	Sepsis, pulmonary haemorrhage, Pneumothorax	Death	Medium	Medium
b873	74	MRSA	Sepsis, LRTI, UTI	Stable	Medium	More
b1021	45	MSSA	CA-Pneumonia	Stable	More	Medium
b1346	16	MRSA	Cardiomyopathy	Stable	More	Less
b1471	24	MRSA	Chronic kidney disease (CKD), Atypical pneumonia	Stable	More	Medium
b1733	12	MRSA	MRSA sepsis	Stable	Med to more	More
b1897	49	MRSA	MRSA sepsis	Stable	More	Medium
b6705	61	MRSA	VA-Pneumonia, septic shock, CKD	Death	Medium	Medium
b2670	73	MSSA	Septic shock, Respiratory failure(RF)	LAMA	More	Less
b3968	26	MRSA	CKD, CA-Pneumonia	Stable	More	Less
b7573	35	MSSA	Dermatomyositis, Disseminated MSSA, HA-pneumonia	Stable	Medium	Less
b2969	38	MSSA	CKD, Sepsis, hypertensive heart disease	Stable	Medium	Less
b3021	38	MRSA	Septic shock, Respiratory distress (Pregnant)	Stable	Medium	More
b9400*	70	MRSA	Trauma- fracture	Death	Medium	More
b3076	37	MRSA	CKD	Stable	Medium	More
b9470*	67	MRSA	Septic shock, VA-Pneumonia	LAMA	Medium	More
b3417	18	MRSA	SARS, septic shock, VA-Pneumonia, DIC	Death	Medium	Medium
b4348	65	MRSA	Trauma- spineinjury	Death	More	Less

## Sheet: Sheet7
ID	Hosp days	Organism	DNase Test	SBA New	Clinical Features	sepsis score	pneumonia score	Criticality	Discharge	score dead	MRSA score	score DNase	score hemo	ID	Organism	Clinical Features	pigment
p6878	42	MRSA	More	Medium	HA-Pneumonia, pancreatitis,COPD	0	1	C	Dead	1	1	3	2	p6878	MRSA	HA-Pneumonia, pancreatitis,COPD	Medium
p6994	2	MRSA	Medium	Medium	Infected forearm with jess fixator	0	0	NC	Stable	0	1	2	2	p6994	MRSA	Infected forearm with jess fixator	Less
p7070	9	MRSA	More	More	CA-Pneumonia- TB, Enteric fever, clavicle fracture	0	1	NC	Stable	0	1	3	3	p7070	MRSA	CA-Pneumonia- TB, Enteric fever, clavicle fracture	Less
b3624	5	MSSA	More	Less	Obstructive uropathy	0	0	NC	Stable	0	0	3	1	b3624	MSSA	Obstructive uropathy	Medium
p7081	6	MRSA	Medium	Less	Osteomyelitis	0	0	NC	Stable	0	1	2	1	p7081	MRSA	Osteomyelitis	Less
p7588	30	MRSA	Less	Less	Fracture	0	0	NC	Stable	0	1	1	1	p7588	MRSA	Fracture	Less
p7683	30	MRSA	More	Medium	2nd degree thermal burn	0	0	NC	Stable	0	1	3	2	p7683	MRSA	2nd degree thermal burn	Less
p7852	2	MRSA	More	More	Orbital cellulitis, sinusitis	0	0	NC	Stable	0	1	3	3	p7852	MRSA	Orbital cellulitis, sinusitis	Less
u9937	7	MSSA	More	Less	Septic shock, pneumonitis	1	1	C	Dead	1	0	3	1	u9937	MSSA	Septic shock, pneumonitis	More
p7882	4	MRSA	Less	More	Fracture	0	0	Nc	Stable	0	1	1	3	p7882	MRSA	Fracture	Less
p7923	66	MRSA	More	Medium	Burn	0	0	NC	Stable	0	1	3	2	p7923	MRSA	Burn	Less
p7925	24	MRSA	More	More	Surgey post traumatic	0	0	NC	Stable	0	1	3	3	p7925	MRSA	Surgey post traumatic	Less
p7992	6	MRSA	Medium	Less	Spondylolisthesis, paraspinal abscess	0	0	NC	Stable	0	1	2	1	p7992	MRSA	Spondylolisthesis, paraspinal abscess	Less
p8088	8	MRSA	Medium	More	Septic shock, MRSA, T Cell lymphoma	1	0	C	Dead	1	1	2	3	p8088	MRSA	Septic shock, MRSA, T Cell lymphoma	Medium
p8303	16	MSSA	More	Medium	Fracture	0	0	NC	Stable	0	0	3	2	p8303	MSSA	Fracture	Medium
b4504	1	MSSA	More	Medium	B cell ALL	0	0	NC	Stable	0	0	3	2	b4504	MSSA	B cell ALL	Medium
p8522	27	MRSA	More	More	LONS, Encephalopathy, Pneumonia, conjunctivitis	0	1	C	Stable	0	1	3	3	p8522	MRSA	LONS, Encephalopathy, Pneumonia, conjunctivitis	Medium
b4595	30	MRSA	More	More	Rheumatic Heart disease	0	0	C	DOPR	0	1	3	3	b4595	MRSA	Rheumatic Heart disease	Medium to More
p8639	34	MRSA	Medium	Less	Septic shock, VA-pneumonia, COPD	1	1	C	Dead	1	1	2	1	p8639	MRSA	Septic shock, VA-pneumonia, COPD	Less
p8693	1	MRSA	Medium	Less	Sinus tachycardia	0	0	NC	Stable	0	1	2	1	p8693	MRSA	Sinus tachycardia	Less
p8877	50	MRSA	Medium	More	Trauma-fracture, liver injury	0	0	NC	Stable	0	1	2	3	p8877	MRSA	Trauma-fracture, liver injury	Less
u11420	8	MRSA	More	More	Urethral stricture	0	0	NC	Stable	0	1	3	3	u11420	MRSA	Urethral stricture	Less
b4911	38	MSSA	More	Medium	Rhinoorbital mucormycosis	0	0	NC	Stable	0	0	3	2	b4911	MSSA	Rhinoorbital mucormycosis	More
p9026	1	MRSA	Less	Less	Gall bladder carcinoma	0	0	NC	Stable	0	1	1	1	p9026	MRSA	Gall bladder carcinoma	Less
p9135	8	MRSA	More	Less	Osteomyelitis	0	0	NC	Stable	0	1	3	1	p9135	MRSA	Osteomyelitis	Medium
p9158	5	MRSA	Medium	More	Infected wound shaft Tibia	0	0	NC	Stable	0	1	2	3	p9158	MRSA	Infected wound shaft Tibia	Medium
p9358	1	MRSA	Less	Less	Bone fracture	0	0	NC	Stable	0	1	1	1	p9358	MRSA	Bone fracture	Medium
p9263	23	MRSA	More	Less	Perforation peritonitis-Trauma	0	0	NC	Stable	0	1	3	1	p9263	MRSA	Perforation peritonitis-Trauma	Less
b5221	10	MRSA	More	More	Glomerulonephritis	0	0	NC	Stable	0	1	3	3	b5221	MRSA	Glomerulonephritis	Medium
b5347	33	MRSA	More	More	Disseminated septic arthritis	1	0	NC	Stable	0	1	3	3	b5347	MRSA	Disseminated septic arthritis	Medium
b5279	11	MSSA	More	More	Sepsis	1	0	NC	Stable	0	0	3	3	b5279	MSSA	Sepsis	Less to Medium
b4704	40	MRSA	More	Medium	LRTI septic shock	1	0	C	LAMA	0	1	3	2	b4704	MRSA	LRTI septic shock	Less
b5163	1	MRSA	Medium	Medium	Septic shock, Respiratory failure(RF)	1	0	C	Dead	1	1	2	2	b5163	MRSA	Septic shock, Respiratory failure(RF)	Medium
p70	4	MRSA	Medium	Medium	Nasal vestibulitis	0	0	NC	Stable	0	1	2	2	p70	MRSA	Nasal vestibulitis	Medium
b27	4	MSSA	More	More	Septic arthritis	1	0	NC	Stable	0	0	3	3	b27	MSSA	Septic arthritis	Less
p105	14	MSSA	Less	Medium	COPD, heart block, kidney injury	0	0	NC	Stable	0	0	1	2	p105	MSSA	COPD, heart block, kidney injury	Medium
b5192	4	MRSA	Medium	Less	Cancer of esophagus	0	0	NC	stable	0	1	2	1	b5192	MRSA	Cancer of esophagus	Less
b6573*	3	MRSA	Medium	More	CA-Pneumonia, RF	0	1	C	Dead	1	1	2	3	b6573*	MRSA	CA-Pneumonia, RF	Medium
b6619*	8	MRSA	Medium	Medium	Body vesicles, polyarthralgia	0	0	NC	LAMA	0	1	2	2	b6619*	MRSA	Body vesicles, polyarthralgia	Medium
b54	26	MRSA	More	More	Disseminated MRSA sepsis, multiple abscess	1	0	NC	Stable	0	1	3	3	b54	MRSA	Disseminated MRSA sepsis, multiple abscess	Less
b6664	51	MSSA	Medium	Medium	Sepsis, Valvular heart disease, Chronic kidney disease	1	0	NC	Stable	0	0	2	2	b6664	MSSA	Sepsis, Valvular heart disease, Chronic kidney disease	Medium
p194	3	MRSA	Medium	More	Glaucoma	0	0	NC	Stable	0	1	2	3	p194	MRSA	Glaucoma	More
b264	15	MRSA	More	More	Septic arthritis, LONS(MRSA)	1	0	NC	Stable	0	1	3	3	b264	MRSA	Septic arthritis, LONS(MRSA)	Medium
u284	9	MSSA	Medium	Medium	DM	0	0	NC	Stable	0	0	2	2	u284	MSSA	DM	Medium to More
p473	7	MRSA	Medium	More	Lower limb soft tissue infection	0	0	NC	Stable	0	1	2	3	p473	MRSA	Lower limb soft tissue infection	Medium
p496	7	MRSA	More	Less	Hand inury infected wound	0	0	NC	Stable	0	1	3	1	p496	MRSA	Hand inury infected wound	Less
p502	5	MRSA	More	Medium	Osteomyelitis	0	0	NC	Stable	0	1	3	2	p502	MRSA	Osteomyelitis	Less
p688	1	MRSA	Medium	Medium	Breast carcinoma	0	0	NC	Stable	0	1	2	2	p688	MRSA	Breast carcinoma	Less to Medium
P798	46	MSSA	More	Medium	Sinus discharge-surgery	0	0	NC	Stable	0	0	3	2	P798	MSSA	Sinus discharge-surgery	Less
p828	3	MRSA	More	Medium	Carcinoma	0	0	NC	Stable	0	1	3	2	p828	MRSA	Carcinoma	Less
P997	16	MRSA	Medium	Medium	Nutrient deficiency, Acrodermatitis enteropathica	0	0	NC	Stable	0	1	2	2	P997	MRSA	Nutrient deficiency, Acrodermatitis enteropathica	Medium
p1028	10	MSSA	Less	Medium	Leprosy	0	0	NC	Stable	0	0	1	2	p1028	MSSA	Leprosy	More
p1032	1	MRSA	More	More	Septic shock, RF	1	0	C	Dead	1	1	3	3	p1032	MRSA	Septic shock, RF	Medium
p1119	1	MSSA	Medium	Less	Neck abscess	0	0	NC	Stable	0	0	2	1	p1119	MSSA	Neck abscess	Medium
b664	1	MRSA	Medium	Medium	Sepsis, pulmonary haemorrhage, Pneumothorax	1	1	C	Dead	1	1	2	2	b664	MRSA	Sepsis, pulmonary haemorrhage, Pneumothorax	Medium
b873	11	MRSA	Medium	More	Sepsis, LRTI, UTI	1	0	NC	Stable	0	1	2	3	b873	MRSA	Sepsis, LRTI, UTI	Medium
p1363	9	MRSA	More	Less	Necrotizing sosft tissue infection NSTI	0	0	NC	Stable	0	1	3	1	p1363	MRSA	Necrotizing sosft tissue infection NSTI	Medium
p1518	1	MSSA	More	Less	Spondylitis, sacrolitis	0	0	NC	Stable	0	0	3	1	p1518	MSSA	Spondylitis, sacrolitis	Less
b1021	10	MSSA	More	Medium	CA-Pneumonia	0	1	NC	Stable	0	0	3	2	b1021	MSSA	CA-Pneumonia	Medium
p1586	50	MRSA	More	Less	Perforation peritonitis	0	0	C	Dead	1	1	3	1	p1586	MRSA	Perforation peritonitis	Less
p1630	1	MRSA	More	More	Giant cell tumor	0	0	NC	Stable	0	1	3	3	p1630	MRSA	Giant cell tumor	Less
p1683	4	MRSA	More	Medium	Breast carcinoma	0	0	NC	Stable	0	1	3	2	p1683	MRSA	Breast carcinoma	Less
P1724	23	MSSA	Medium	More	Pleural effusion, MRSA, kidney injury	0	0	C	Unstable-LAMA	0	0	2	3	P1724	MSSA	Pleural effusion, MRSA, kidney injury	Medium
P1732	5	MSSA	Medium	More	Bone fracture	0	0	NC	Stable	0	0	2	3	P1732	MSSA	Bone fracture	Medium
p1869	5	MRSA	Medium	Medium	Sacral pressure sore	0	0	NC	Stable	0	1	2	2	p1869	MRSA	Sacral pressure sore	Medium
b1346	22	MRSA	More	Less	Cardiomyopathy	0	0	NC	Stable	0	1	3	1	b1346	MRSA	Cardiomyopathy	Less
p2225	8	MRSA	Medium	Medium	Chronic kidney disease, Pneumonitis	0	1	C	Stable	0	1	2	2	p2225	MRSA	Chronic kidney disease, Pneumonitis	Less
p2267	9	MSSA	Medium	More	CKD	0	0	C	Unstable-LAMA	0	0	2	3	p2267	MSSA	CKD	Medium
p2271	1	MSSA	Less	More	Carcinoma	0	0	NC	Stable	0	0	1	3	p2271	MSSA	Carcinoma	Medium
b1471	8	MRSA	Medium	Medium	Chronic kidney disease (CKD), Atypical pneumonia	0	1	C	Stable	0	1	2	2	b1471	MRSA	Chronic kidney disease (CKD), Atypical pneumonia	Less
p2308	46	MSSA	More	Medium	Surgical sinus discharge	0	0	NC	Stable	0	0	3	2	p2308	MSSA	Surgical sinus discharge	Medium
p2416	1	MRSA	Less	Less	Arthritis	0	0	NC	Stable	0	1	1	1	p2416	MRSA	Arthritis	Less
b1733	13	MRSA	More	More	MRSA sepsis	1	0	NC	Stable	0	1	3	3	b1733	MRSA	MRSA sepsis	Medium
p2625(B)	12	MRSA	More	Less	spinal lesion	0	0	NC	Stable	0	1	3	1	p2625(B)	MRSA	spinal lesion	Medium
p2737	2	MRSA	More	Less	Nasal vestibulitis, abscess	0	0	NC	Stable-LAMA	0	1	3	1	p2737	MRSA	Nasal vestibulitis, abscess	Less
p2823	22	MRSA	Medium	Less	Sepsis	1	0	NC	Stable	0	1	2	1	p2823	MRSA	Sepsis	Medium
p2902	84	MRSA	Medium	Less	Chronic hypertension, pregnancy	0	0	NC	Stable	0	1	2	1	p2902	MRSA	Chronic hypertension, pregnancy	Less
b1897	6	MRSA	More	Medium	MRSA sepsis	1	0	NC	Stable	0	1	3	2	b1897	MRSA	MRSA sepsis	Medium
p3241	3	MSSA	Medium	Less	Infected implant	0	0	NC	Stable	0	0	2	1	p3241	MSSA	Infected implant	Medium
p3269	5	MSSA	More	Medium	Dermatitis, oral candidiasis	0	0	NC	Stable	0	0	3	2	p3269	MSSA	Dermatitis, oral candidiasis	Medium
p3510	6	MSSA	Less	Less	Implant infection	0	0	NC	Stable	0	0	1	1	p3510	MSSA	Implant infection	Less
p3511	5	MRSA	Medium	More	Fracture	0	0	NC	Stable	0	1	2	3	p3511	MRSA	Fracture	Medium to More
p3513	23	MRSA	More	More	Myasthenia Gravis, sepsis	1	0	NC	Stable	0	1	3	3	p3513	MRSA	Myasthenia Gravis, sepsis	Medium
P3488	20	MRSA	Less	Less	Lung consolidation, empyema	0	0	NC	Stablr	0	1	1	1	P3488	MRSA	Lung consolidation, empyema	Less
b6705	40	MRSA	Medium	Medium	VA-Pneumonia, septic shock, CKD	1	1	C	Dead	1	1	2	2	b6705	MRSA	VA-Pneumonia, septic shock, CKD	More
P3694	12	MRSA	More	More	Otitis, mucosal disease	0	0	NC	Stable	0	1	3	3	P3694	MRSA	Otitis, mucosal disease	Medium
b2670	1	MSSA	More	Less	Septic shock, Respiratory failure(RF)	1	0	C	LAMA	0	0	3	1	b2670	MSSA	Septic shock, Respiratory failure(RF)	Less
b3968	8	MRSA	More	Less	CKD, CA-Pneumonia	0	1	NC	Stable	0	1	3	1	b3968	MRSA	CKD, CA-Pneumonia	Medium
p4075	9	MRSA	More	Medium	Liver & pelvic hydatid cyst	0	0	NC	Stable	0	1	3	2	p4075	MRSA	Liver & pelvic hydatid cyst	Medium
b7573	20	MSSA	Medium	Less	Dermatomyositis, Disseminated MSSA, HA-pneumonia	0	1	NC	Stable	0	0	2	1	b7573	MSSA	Dermatomyositis, Disseminated MSSA, HA-pneumonia	Less
p3961	10	MRSA	Medium	Less	Septic shock, HA-pneumonia	1	1	C	LAMA	0	1	2	1	p3961	MRSA	Septic shock, HA-pneumonia	Less
P3984	4	MRSA	More	Medium	Fracture	0	0	NC	Stable	0	1	3	2	P3984	MRSA	Fracture	Medium
p8499*	17	MRSA	Medium	More	Diabetic foot ulcer	0	0	NC	Stable	0	1	2	3	p8499*	MRSA	Diabetic foot ulcer	Medium to More
b2969	13	MSSA	Medium	Less	CKD, Sepsis, hypertensive heart disease	1	0	NC	Stable	0	0	2	1	b2969	MSSA	CKD, Sepsis, hypertensive heart disease	Less
b3021	12	MRSA	Medium	More	Septic shock, Respiratory distress (Pregnant)	1	0	NC	Stable	0	1	2	3	b3021	MRSA	Septic shock, Respiratory distress (Pregnant)	Medium
b9400*	6	MRSA	Medium	More	Trauma- fracture	0	0	C	Dead	1	1	2	3	b9400*	MRSA	Trauma- fracture	Medium to More
p4492	1	MRSA	More	Medium	Breast carcinoma	0	0	NC	Stable	0	1	3	2	p4492	MRSA	Breast carcinoma	Medium
p4434	1	MRSA	More	More	Surgical site infection	0	0	NC	Stable	0	1	3	3	p4434	MRSA	Surgical site infection	Medium
p4486	23	MRSA	More	More	Post trauma wound	0	0	NC	Stable	0	1	3	3	p4486	MRSA	Post trauma wound	Medium
b3076	13	MRSA	Medium	More	CKD	0	0	C	Stable	0	1	2	3	b3076	MRSA	CKD	Medium
p4656	3	MRSA	More	Less	Osteomyelitis, ulcer	0	0	NC	Stable	0	1	3	1	p4656	MRSA	Osteomyelitis, ulcer	Less
b9470*	16	MRSA	Medium	More	Septic shock, VA-Pneumonia	1	1	C	LAMA	0	1	2	3	b9470*	MRSA	Septic shock, VA-Pneumonia	Medium to More
p4753	40	MRSA	Medium	More	Traumatic brain injury	0	0	C	Stable	0	1	2	3	p4753	MRSA	Traumatic brain injury	Medium
p5018	5	MRSA	More	More	Axonal injury	0	0	C	Dead	1	1	3	2	p5018	MRSA	Axonal injury	Medium
b3417	4	MRSA	Medium	Medium	SARS, septic shock, VA-Pneumonia, DIC	1	1	C	Dead	1	1	2	2	b3417	MRSA	SARS, septic shock, VA-Pneumonia, DIC	Medium
u6774	11	MRSA	More	More	Seizure didorder (pregnancy)	0	0	NC	Stable	0	1	3	3	u6774	MRSA	Seizure didorder (pregnancy)	More
p5799	6	MSSA	More	More	Septic shock, septic arthritis	1	0	C	Dead	1	0	3	3	p5799	MSSA	Septic shock, septic arthritis	Medium
p5885	7	MRSA	Medium	Medium	Hand abscess, scabies	0	0	NC	Stable	0	1	2	2	p5885	MRSA	Hand abscess, scabies	Less
p6014	1	MRSA	Medium	More	Finger dislocation infection	0	0	NC	Stable	0	1	2	3	p6014	MRSA	Finger dislocation infection	More
b4348	54	MRSA	More	Less	Trauma- spineinjury	0	0	C	Dead	1	1	3	1	b4348	MRSA	Trauma- spineinjury	Medium
p6192	14	MSSA	More	More	Cholangtic abscess	0	0	NC	Stable	0	0	3	3	p6192	MSSA	Cholangtic abscess	More
p6452	2	MRSA	Less	Less	Epistaxis	0	0	NC	Stable	0	1	1	1	p6452	MRSA	Epistaxis	Medium
	Avg days
	14.1607
										0.105951
										0.0386051
										-0.00228182

## Sheet: Sheet10
ID	sepsis score				ID	cq			ID	cq			ID	cq	Resistivity			ID	AST			Ciprofloxacin	Levofloxacin		Ciprofloxacin	Levofloxacin		C	L		ID	Capsule		ID	cq			ID	D-Zone mm	SBA H-zone mm	cq				ID	ct	SBA score
p6878	0				p6574	21.88			p6878				p6574	21.88				p6574	31.25			R	R		R	R		1	1		p6878			p6574	21.88			p6878	11	7					p6878		2		ct
p6994	0	21.28			p6994	21.28			p6574	21.88			p6994	21.28				p6994	25			R	R		R	R		1	1		p6574			p6994	21.28			p6574	10	6	21.88				p6574	21.88	1		21.88
p7070	0	19.79			p7070	19.79			p6994	21.28			p7070	19.79				p7070	50			R	R		R	R		1	1		p6994			p7070	19.79			p6994	9	9	21.28				p6994	21.28	2		22.63
b3624	0				p7081	22.63			p7070	19.79			p7081	22.63				p7081	43.75			R	R		R	R		1	1		p7070			p7081	22.63			p7070	10	9	19.79				p7070	19.79	3		20.82
p7081	0	22.63			p7683	24.14			b3624				p7683	24.14				p7683	43.75			R	R		R	R		1	1		b3624			p7683	24.14			b3624	13	6					b3624		1		27.45
p7588	0				p7852	20.92			p7081	22.63			p7852	20.92				p7852	53.3			R	R		R	R		1	1		p7081			p7852	20.92			p7081	8	6	22.63				p7081	22.63	1		20.41
p7683	0	24.14			p7882	21.72			p7439				p7882	21.72				p7882	66.66			R	R		R	R		1	1		p7439			p7882	21.72			p7439	10	10					p7439		3		25.72
p7852	0	20.92			p7925	20.98			p7588				p7925	20.98				p7925	26.66			R	R		R	R		1	1		p7588	Present		p7925	20.98			p7588	6	5					p7588		1		28.35
u9937	1				p6680*	20.82			p7683	24.14			p6680*	20.82				p6680*	31.25			R	R		R	R		1	1		p7683			p6680*	20.82			p7683	14	6	24.14				p7683	24.14	2		30.11
p7882	0	21.72			p7953	27.45			p7852	20.92			p7953	27.45				p7953	50			R	R		R	R		1	1		p7852			p7953	27.45			p7852	11	11	20.92				p7852	20.92	3		20.95
p7923	0				p7992	20.41			u9937				p7992	20.41				p7992	46.66			R	R		R	R		1	1		u9937			p7992	20.41			u9937	10	5					u9937		1		22.51
p7925	0	20.98			p8088	28.5			p7882	21.72			p8088	28.5				p8088	46.66			R	R		R	R		1	1		p7882			p8088	28.5			p7882	5	10	21.72				p7882	21.72	3		21.68
p7992	0	20.41			p8126	25.72			p7923				p8126	25.72				p8126	40			R	R		R	R		1	1		p7923			p8126	25.72			p7923	10	9					p7923		2		19.53
p8088	1	28.5			b4504	21.42			p7925	20.98			b4504	21.42				b4504	25			R	R		R	R		1	1		p7925			b4504	21.42			p7925	11	10	20.98				p7925	20.98	3		20.51
p8303	0				p8498	20.48			p6680*	20.82			p8498	20.48				p8498	25			R	R		R	R		1	1		p6680*			p8498	20.48			p6680*	10	6	20.82				p6680*	20.82	1		21.59
b4504	0	21.42			p8522	20.83			p7953	27.45			p8522	20.83				p8522	46.66			R	R		R	R		1	1		p7953			p8522	20.83			p7953	11	7	27.45				p7953	27.45	1		22.29
p8522	0				p8693	28.35			p7992	20.41			p8693	28.35				p8693	43.75			R	R		R	R		1	1		p7992			p8693	28.35			p7992	8	5	20.41				p7992	20.41	1		22.96
b4595	0				p8877	20.2			p8088	28.5			p8877	20.2				p8877	46.66			R	R		R	R		1	1		p8088			p8877	20.2			p8088	8	10	28.5				p8088	28.5	3		18.66
p8639	1				u11420	22.89			p8126	25.72			u11420	22.89				u11420	40			R	R		R	R		1	1		p8126			u11420	22.89			p8126	5	5	25.72				p8126	25.72	1		21.85
p8693	0				p8945	20.61			p8303				p8945	20.61				p8945	50			R	R		R	R		1	1		p8303			p8945	20.61			p8303	10	9					p8303		2		22.59
p8877	0				p8946	21.8			p8165				p8946	21.8				p8946	50			R	R		R	R		1	1		p8165			p8946	21.8			p8165	6	6					p8165		1		20.95
u11420	0				p8947	21.76			p8530*				p8947	21.76				p8947	25			R	R		R	R		1	1		p8530*			p8947	21.76			p8530*	10	7					p8530*		2		21.53
b4911	0	19.73			p8962	30.11			p8364				p8962	30.11				p8962	25			R	R		R	R		1	1		p8364			p8962	30.11			p8364	8	10					p8364		3		19.71
p9026	0				b4911	19.73			b4504	21.42			b4911	19.73				b4911	37.5			R	R		R	R		1	1		b4504			b4911	19.73			b4504	10	8	21.42				b4504	21.42	2		19.31
p9135	0	20.95			u11480	20.41			p8498	20.48			u11480	20.41				u11480	31.25			R	R		R	R		1	1		p8498			u11480	20.41			p8498	10	10	20.48				p8498	20.48	3		18.77
p9158	0				p9135	20.95			p8497				p9135	20.95				p9135	46.66			R	R		R	R		1	1		p8497			p9135	20.95			p8497	9	5					p8497		1		20.39
p9358	0				b5221	23.96			p8522				b5221	23.96				b5221	31.25			R	R		R	R		1	1		p8522			b5221	23.96			p8522	11	11					p8522	20.83	3		21.6
p9263	0				b5347	22.4			b4595				b5347	22.4				b5347	50			R	R		R	R		1	1		b4595			b5347	22.4			b4595	11	11					b4595		3		23.29
b5221	0	23.96			b4704	20.24			p8639				b4704	20.24				b4704	31.25			R	R		R	R		1	1		p8639			b4704	20.24			p8639	7	5					p8639		1		21.28
b5347	1	22.4			p70	21.37			p8693				p70	21.37				p70	43.75			R	R		R	R		1	1		p8693			p70	21.37			p8693	8	5					p8693	28.35	1		24.14
b5279	1				b27	20.78			p8877				b27	20.78				b27	25			CIP	LEV		R	R		1	1		p8877			b27	20.78			p8877	9	10					p8877	20.2	3		21.42
b4704	1	20.24			b6664	19.46			u11420				b6664	19.46				b6664	40			R	R		R	R		1	1		u11420			b6664	19.46			u11420	10	11					u11420	22.89	3		21.8
b5163	1				p194	20.83			p8945				p194	20.83				p194	31.25			R	R		R	R		1	1		p8945			p194	20.83			p8945	11	11					p8945	20.61	3		19.73
p70	0	21.37			b264	22.16			p8946	21.8			b264	22.16				b264	43.75			R	R		R	R		1	1		p8946	Present	21.8	b264	22.16			p8946	7	8	21.8				p8946	21.8	2		20.24
b27	1	20.78			p295	23.03			p8947	21.76			p295	23.03				p295	43.75			R	R		R	R		1	1		p8947			p295	23.03			p8947	7	11	21.76				p8947	21.76	3		21.37
p105	0				p405	20.52			p8962	30.11			p405	20.52				p405	18.75			R	R		R	R		1	1		p8962			p405	20.52			p8962	6	7	30.11				p8962	30.11	1		19.46
b5192	0				p473	21.13			b4911	19.73			p473	21.13				p473	31.25			R	R		R	R		1	1		b4911			p473	21.13			b4911	10	7	19.73				b4911	19.73	2		20.52
b6573*	0				p496	22.51			p9026				p496	22.51				p496	40			R	R		R	R		1	1		p9026			p496	22.51			p9026	6	5					p9026		1		27.95
b6619*	0				p502	27.95			u11480	20.41			p502	27.95				p502	46.66			R	R		R	R		1	1		u11480			p502	27.95			u11480	6	10	20.41				u11480	20.41	3		24.03
b54	1				p688	24.03			p9135	20.95			p688	24.03				p688	31.25			R	R		R	R		1	1		p9135			p688	24.03			p9135	11	5	20.95				p9135	20.95	1		25
b6664	1	19.46			P798	25			p9158				P798	25				P798	31.25			R	R		R	R		1	1		p9158			P798	25			p9158	8	10					p9158		3		21.33
p194	0	20.83			p1028	21.33			p9358				p1028	21.33				p1028	26.66			R	R		R	R		1	1		p9358			p1028	21.33			p9358	6	5					p9358		1		22.2
b264	1	22.16			p1032	20.48			p9263				p1032	20.48				p1032	46.44			R	R		R	R		1	1		p9263			p1032	20.48			p9263	10	6					p9263		1		18.89
u284	0				b873	21.71			b5221	23.96			b873	21.71				b873	60			R	R		R	R		1	1		b5221			b873	21.71			b5221	12	10	23.96				b5221	23.96	3		20.61
p473	0	21.13			p1518	21.68			b5347	22.4			p1518	21.68				p1518	37.5			R	R		R	R		1	1		b5347			p1518	21.68			b5347	11	10	22.4				b5347	22.4	3		23.15
p496	0	22.51			u1796	19.53			b5279				u1796	19.53				u1796	31.25			R	R		R	R		1	1		b5279			u1796	19.53			b5279	10	10					b5279		3		22.06
p502	0	27.95			p1586	20.51			b4704*	20.24			p1586	20.51				p1586	64.28			R	R		R	R		1	1		b4704*	Present	20.24	p1586	20.51			b4704*	10	7	20.24				b4704*	20.24	2		21.38
p688	0	24.03			p1630	21.17			b5163				p1630	21.17				p1630	56.25			R	R		R	R		1	1		b5163			p1630	21.17			b5163	7	7					b5163		2		21.42
P798	0	25			p1683	22.2			p34				p1683	22.2				p1683	43.75			R	R		R	R		1	1		p34			p1683	22.2			p34	6	10					p34		3		20.7
p828	0				P1732	24.19			p70	21.37			P1732	24.19				P1732	18.75			R	R		R	R		1	1		p70	Present	21.37	P1732	24.19			p70	7	8	21.37				p70	21.37	2		19.79
P997	0				b1346	21.59			b27	20.78			b1346	21.59				b1346	50			R	R		R	R		1	1		b27			b1346	21.59			b27	11	10	20.78				b27	20.78	3		20.92
p1028	0	21.33			p2267	21.17			p105				p2267	21.17				p2267	18.75			R	R		R	R		1	1		p105			p2267	21.17			p105	6	7					p105		2		21.72
p1032	1	20.48			p2271	19.15			b5192				p2271	19.15				p2271	25			R	R		R	R		1	1		b5192			p2271	19.15			b5192	7	5					b5192		1		20.98
p1119	0				b1471	18.89			b6573*				b1471	18.89				b1471	50			R	R		R	R		1	1		b6573*			b1471	18.89			b6573*	9	10					b6573*		3		28.5
b664	1				p2284	22.29			b6619*				p2284	22.29				p2284	25			R	R		R	R		1	1		b6619*			p2284	22.29			b6619*	7	9					b6619*		2		20.48
b873	1	21.71			p2315	21			b54				p2315	21				p2315	43.75			R	R		R	R		1	1		b54			p2315	21			b54	10	11					b54		3		20.83
p1363	0				p2308	20.61			b6664*	19.46			p2308	20.61				p2308	25			CIP	LEV		R	R		1	1		b6664*			p2308	20.61			b6664*	7	7	19.46				b6664*	19.46	2		20.2
p1518	0	21.68			p2379	22.96			p194	20.83			p2379	22.96				p2379	31.25			R	R		R	R		1	1		p194			p2379	22.96			p194	7	10	20.83				p194	20.83	3		22.89
b1021	0				b1733	19.69			b264	22.16			b1733	19.69				b1733	46.66			R	R		R	R		1	1		b264			b1733	19.69			b264	14	10	22.16				b264	22.16	3		20.61
p1586	0	20.51			p2625	18.66			p295	23.03			p2625	18.66				p2625	37.5			R	R		R	R		1	1		p295			p2625	18.66			p295	11	10	23.03				p295	23.03	3		21.76
p1630	0	21.17			p2823	21.85			u284				p2823	21.85				p2823	37.5			R	R		R	R		1	1		u284			p2823	21.85			u284	8	9					u284		2		20.41
p1683	0	22.2			p2930	22.27			p348				p2930	22.27				p2930	37.5			R	R		R	R		1	1		p348			p2930	22.27			p348	9	11					p348		3		23.96
P1724	0				p3241	22.59			p405	20.52			p3241	22.59				p3241	37.5			R	R		R	R		1	1		p405			p3241	22.59			p405	10	9	20.52				p405	20.52	2		22.4
P1732	0	24.19			p3269	20.76			p473	21.13			p3269	20.76				p3269	25			R	R		R	R		1	1		p473			p3269	20.76			p473	13	10	21.13				p473	21.13	3		20.78
p1869	0				p3511	19.69			p496	22.51			p3511	19.69				p3511	50			R	R		R	R		1	1		p496			p3511	19.69			p496	10	5	22.51				p496	22.51	1		20.83
b1346	0	21.59			b6705	23.15			p502	27.95			b6705	23.15				b6705	33.33			R	R		R	R		1	1		p502			b6705	23.15			p502	10	8	27.95				p502	27.95	2		22.16
p2225	0				P3694	19.9			p688	24.03			P3694	19.9				P3694	31.25			R	R		R	R		1	1		p688			P3694	19.9			p688	7	7	24.03				p688	24.03	2		23.03
p2267	0	21.17			P3895	20.95			P798	25			P3895	20.95				P3895	31.25			R	R		R	R		1	1		P798			P3895	20.95			P798	10	9	25				P798	25	2		21.13
p2271	0	19.15			b3968	21.53			p828				b3968	21.53				b3968	37.5			R	R		R	R		1	1		p828			b3968	21.53			p828	10	8					p828		2		21.71
b1471	0	18.89			p4079	19.71			P997				p4079	19.71				p4079	37.5			R	R		R	R		1	1		P997			p4079	19.71			P997	7	8					P997		2		21.17
p2308	0	20.61			b7573*	19.31			p1028	21.33			b7573*	19.31				b7573*	18.75			R	R		R	R		1	1		p1028			b7573*	19.31			p1028	5	9	21.33				p1028	21.33	2		24.19
p2416	0				P3984	22.06			p1032	20.48			P3984	22.06				P3984	25			R	R		R	R		1	1		p1032			P3984	22.06			p1032	13	10	20.48				p1032	20.48	3		21.17
b1733	1	19.69			b3021	21.29			p1119				b3021	21.29				b3021	33.33			R	R		R	R		1	1		p1119			b3021	21.29			p1119	7	5					p1119		1		19.15
p2625(B)	0	18.66			b9400*	19.57			p1026				b9400*	19.57				b9400*	25			CIP	LEV		R	R		1	1		p1026			b9400*	19.57			p1026	10	9					p1026		2		21
p2737	0				p4492	21.38			b664				p4492	21.38				p4492	37.5			R	R		R	R		1	1		b664			p4492	21.38			b664	8	7					b664		2		19.69
p2823	1	21.85			p4434	22.61			b873	21.71			p4434	22.61				p4434	43.75			R	R		R	R		1	1		b873	Present	21.71	p4434	22.61			b873	8	11	21.71				b873	21.71	3		22.27
p2902	0				p4486	19.93			p1363				p4486	19.93				p4486	50			R	R		R	R		1	1		p1363			p4486	19.93			p1363	11	6					p1363		1		19.69
b1897	1				b3076	19.98			p1518	21.68			b3076	19.98				b3076	31.25			R	R		R	R		1	1		p1518	Present	21.68	b3076	19.98			p1518	12	6	21.68				p1518	21.68	1		19.9
p3241	0	22.59			p4656	18.77			u1796	19.53			p4656	18.77				p4656	53.33			R	R		R	R		1	1		u1796			p4656	18.77			u1796	8	5	19.53				u1796	19.53	1		21.29
p3269	0	20.76			b9470*	19.14			b1021				b9470*	19.14				b9470*	43.75			R	R		S	S		0	0		b1021			b9470*	19.14			b1021	10	8					b1021		2		19.57
p3510	0				p4753	19.76			p1586	20.51			p4753	19.76				p4753	31.25			R	R		R	R		1	1		p1586			p4753	19.76			p1586	10	5	20.51				p1586	20.51	1		22.61
p3511	0	19.69			p5018	21.42			p1630	21.17			p5018	21.42				p5018	31.25			R	R		R	R		1	1		p1630			p5018	21.42			p1630	10	11	21.17				p1630	21.17	3		19.93
p3513	1				p5315	20.39			p1683	22.2			p5315	20.39				p5315	43.75			S	S		R	R		1	1		p1683	Present	22.2	p5315	20.39			p1683	10	8	22.2				p1683	22.2	2		19.98
P3488	0				p5799	20.42			P1724				p5799	20.42				p5799	20			R	R		R	R		1	1		P1724			p5799	20.42			P1724	7	10					P1724		3		19.14
b6705	1	23.15			p5885	20.7			P1732	24.19			p5885	20.7				p5885	31.25			R	R		R	R		1	1		P1732			p5885	20.7			P1732	8	12	24.19				P1732	24.19	3		19.76
P3694	0	19.9			p6014	24.37			p1869				p6014	24.37				p6014	25			R	R		R	R		1	1		p1869			p6014	24.37			p1869	8	7					p1869		2		20.42
b2670	1				p6073	20.31			b1346	21.59			p6073	20.31				p6073	37.5			R	R		R	R		1	1		b1346			p6073	20.31			b1346	10	6	21.59				b1346	21.59	1		24.37
b3968	0	21.53			b4348	21.6			p2150				b4348	21.6				b4348	66.66			R	R		R	R		1	1		p2150			b4348	21.6			p2150	13	6					p2150		1		20.31
p4075	0				p6192	19.9			p2225				p6192	19.9				p6192	18.75			R	R		R	R		1	1		p2225			p6192	19.9			p2225	9	9					p2225		2		19.9
b7573	0	19.31			p6452	23.29			p2267	21.17			p6452	23.29				p6452	50			R	R		R	R		1	1		p2267			p6452	23.29			p2267	7	11	21.17				p2267	21.17	3
p3961	1								p2271	19.15												R	R		R	R		1	1		p2271							p2271	6	10	19.15				p2271	19.15	3
P3984	0	22.06							b1471	18.89												R	R		R	R		1	1		b1471							b1471	9	8	18.89				b1471	18.89	2
p8499*	0								p2284	22.29												R	R		R	R		1	1		p2284							p2284	7	5	22.29				p2284	22.29	1
b2969	1								p2315	21												R	R		R	R		1	1		p2315							p2315	12	12	21				p2315	21	3
b3021	1	21.29							U2753													R	R		R	R		1	1		U2753							U2753	7	5					U2753		1
b9400*	0	19.57							p2308	20.61												R	R		R	R		1	1		p2308							p2308	10	8	20.61				p2308	20.61	2
p4492	0	21.38							p2357													R	R		R	R		1	1		p2357							p2357	5	10					p2357		3
p4434	0	22.61							p2379	22.96												R	R		R	R		1	1		p2379							p2379	7	6	22.96				p2379	22.96	1
p4486	0	19.93							p2416													R	R		R	R		1	1		p2416							p2416	5	5					p2416		1
b3076	0	19.98							b1733	19.69												R	R		R	R		1	1		b1733							b1733	10	11	19.69				b1733	19.69	3
p4656	0	18.77							p2625	18.66												R	R		R	R		1	1		p2625							p2625	13	6	18.66				p2625	18.66	1
b9470*	1	19.14							p2737													R	R		R	R		1	1		p2737							p2737	10	6					p2737		1
p4753	0	19.76							p2738													R	R		R	R		1	1		p2738							p2738	9	7					p2738		2
p5018	0	21.42							p2806													R	R		R	R		1	1		p2806							p2806	5	5					p2806		1
b3417	1								p2823	21.85												R	R		R	R		1	1		p2823	Present	21.85					p2823	8	6	21.85				p2823	21.85	1
u6774	0								p2796													CIP	LEV		S	S		0	0		p2796							p2796	9	8					p2796		2
p5799	1	20.42							p2902													R	R		R	R		1	1		p2902							p2902	9	6					p2902		1
p5885	0	20.7							p2929													R	R		R	R		1	1		p2929							p2929	10	7					p2929		2
p6014	0	24.37							p2930	22.27												R	R		R	R		1	1		p2930							p2930	13	10	22.27				p2930	22.27	3
b4348	0	21.6							b1897													S	S		R	R		1	1		b1897							b1897	13	7					b1897		2
p6192	0	19.9							p3241	22.59												R	R		R	R		1	1		p3241							p3241	7	6	22.59				p3241	22.59	1
p6452	0	23.29							p3269	20.76												R	R		R	R		1	1		p3269							p3269	10	9	20.76				p3269	20.76	2
									p3510													R	R		R	R		1	1		p3510	Present						p3510	6	5					p3510		1
									p3511	19.69												R	R		R	R		1	1		p3511	Present	19.69					p3511	7	10	19.69				p3511	19.69	3
									p3513													R	R		R	R		1	1		p3513							p3513	10	8					p3513		3
									P3488													R	R		R	R		1	1		P3488							P3488	5	5					P3488		1
									b6705	23.15												R	R		R	R		1	1		b6705							b6705	8	10	23.15				b6705	23.15	2
									P3694	19.9												R	R		R	R		1	1		P3694							P3694	10	10	19.9				P3694	19.9	3
									P3895	20.95												R	R		R	R		1	1		P3895							P3895	9	5	20.95				P3895	20.95	1
									b2670													R	R		R	R		1	1		b2670							b2670	10	6					b2670		1
									b3968	21.53												R	R		R	R		1	1		b3968							b3968	11	5	21.53				b3968	21.53	1
									p4075													R	R		R	R		1	1		p4075							p4075	12	7					p4075		2
									p4079	19.71												R	R		R	R		1	1		p4079							p4079	7	5	19.71				p4079	19.71	1
									b7573*	19.31												R	R		R	R		1	1		b7573*							b7573*	8	6	19.31				b7573*	19.31	1
									p3961													R	R		R	R		1	1		p3961							p3961	8	6					p3961		1
									P3984	22.06												R	R		R	R		1	1		P3984	Present						P3984	10	8	22.06				P3984	22.06	2
									p8499*													R	R		R	R		1	1		p8499*							p8499*	8	10					p8499*		3
									b2969													R	R		R	R		1	1		b2969							b2969	8	5					b2969		1
									b3021	21.29												R	R		R	R		1	1		b3021							b3021	9	10	21.29				b3021	21.29	3
									b9400*	19.57												R	R		R	R		1	1		b9400*							b9400*	7	12	19.57				b9400*	19.57	3
									p4492	21.38												R	R		R	R		1	1		p4492	Present	21.38					p4492	10	7	21.38				p4492	21.38	2
									p4434	22.61												R	R		R	R		1	1		p4434							p4434	10	11	22.61				p4434	22.61	3
									p4486	19.93												R	R		R	R		1	1		p4486							p4486	13	11	19.93				p4486	19.93	3
									b3076	19.98												R	R		R	R		1	1		b3076	Present	19.98					b3076	8	11	19.98				b3076	19.98	3
									p4656	18.77												R	R		R	R		1	1		p4656							p4656	10	5	18.77				p4656	18.77	1
									b9470*	19.14												R	R		R	R		1	1		b9470*							b9470*	7	10	19.14				b9470*	19.14	3
									p4753	19.76												R	R		R	R		1	1		p4753							p4753	8	11	19.76				p4753	19.76	3
									u6041													CIP	LEV		R	R		1	1		u6041							u6041	6	11					u6041		3
									p5018	21.42												R	R		R	R		1	1		p5018							p5018	12	8	21.42				p5018	21.42	2
									b3417													R	R		R	R		1	1		b3417							b3417	7	8					b3417		2
									p5205													R	R		R	R		1	1		p5205							p5205	10	5					p5205		1
									p5315	20.39												R	R		R	R		1	1		p5315	Present	20.39					p5315	10	6	20.39				p5315	20.39	1
									u6774													R	R		R	R		1	1		u6774							u6774	9	10					u6774		3
									p5799	20.42												R	R		R	R		1	1		p5799							p5799	10	11	20.42				p5799	20.42	3
									p5885	20.7												R	R		R	R		1	1		p5885							p5885	9	8	20.7				p5885	20.7	2
									p6014	24.37												R	R		R	R		1	1		p6014							p6014	7	10	24.37				p6014	24.37	3
									p6073	20.31												R	R		R	R		1	1		p6073							p6073	10	10	20.31				p6073	20.31	3
									b4348	21.6												R	R		R	R		1	1		b4348							b4348	10	5	21.6				b4348	21.6	1
									p6192	19.9												R	R		R	R		1	1		p6192							p6192	10	10	19.9				p6192	19.9	3
									p6452	23.29												R	R		R	R		1	1		p6452							p6452	6	6	23.29				p6452	23.29	1
																						R	R
																						R	R
																						R	R
																						R	R
																						R	R
[truncated: 35 more columns]

## Sheet: Sheet8
ID	cq	RTqPCR	D-Zone mm	ID			ID	cq	RTqPCR	D-Zone mm	SBA H-zone mm	score pigment	mrsa	AST		ID		cq	RTqPCR	D-Zone mm	SBA H-zone mm	pig	mrsa	AST		cq
p6994	21.28	Done	9	p6878			p6574	21.88	Done	10	6	2	1			p6574		21.88	Done	10	6	1	0	31.25		21.88
p7070	19.79	Done	10	p6574			p6994	21.28	Done	9	9	1	0			p6994		21.28	Done	9	9	1	1	25		21.28
p7081	22.63	Done	8	p6994			p7070	19.79	Done	10	9	1	1			p7070		19.79	Done	10	9	1	1	50		19.79
p7852	20.92	Done	11	p7070			p7081	22.63	Done	8	6	1	1			p7081		22.63	Done	8	6	1	1	43.75		22.63
p6680*	20.82	Done	10	b3624			p7683	24.14	Done	14	6	2	0			p7683		24.14	Done	14	6	1	1	43.75		24.14
p7953	27.45	Done	11	p7081			p7852	20.92	Done	11	11	1	1			p7852		20.92	Done	11	11	1	1	53.3		20.92
p8088	28.5	Done	8	p7439			p7882	21.72	Done	5	10	1	1			p7882		21.72	Done	5	10	1	1	66.66		21.72
b4504	21.42	Done	10	p7588			p7925	20.98	Done	11	10	1	1			p7925		20.98	Done	11	10	1	1	26.66		20.98
p8498	20.48	Done	10	p7683			p6680*	20.82	Done	10	6	1	1			p6680*		20.82	Done	10	6	1	0	31.25		20.82
p8522	20.83	Done	11	p7852			p7953	27.45	Done	11	7	1	1			p7953		27.45	Done	11	7	1	1	50		27.45
p8693	28.35	Done	8	u9937			p7992	20.41	Done	8	5	3	0			p7992		20.41	Done	8	5	1	1	46.66		20.41
p8877	20.2	Done	9	p7882			p8088	28.5	Done	8	10	1	1			p8088		28.5	Done	8	10	2	1	46.66		28.5
u11420	22.89	Done	10	p7923			p8126	25.72	Done	5	5	1	1			p8126		25.72	Done	5	5	1	1	40		25.72
b4911	19.73	Done	10	p7925			b4504	21.42	Done	10	8	1	1			b4504		21.42	Done	10	8	2	0	25		21.42
u11480	20.41	Done	6	p6680*			p8498	20.48	Done	10	10	1	0			p8498		20.48	Done	10	10	1	1	25		20.48
b5221	23.96	Done	12	p7953			p8522	20.83	Done	11	11	1	1			p8522		20.83	Done	11	11	2	1	46.66		20.83
p70	21.37	Done	7	p7992			p8693	28.35	Done	8	5	1	1			p8693		28.35	Done	8	5	1	1	43.75		28.35
b27	20.78	Done	11	p8088			p8877	20.2	Done	9	10	2	1			p8877		20.2	Done	9	10	1	1	46.66		20.2
b6664	19.46	Done	7	p8126			u11420	22.89	Done	10	11	1	1			u11420		22.89	Done	10	11	1	1	40		22.89
p194	20.83	Done	7	p8303			p8945	20.61	Done	11	11	2	0			p8945		20.61	Done	11	11	1	0	50		20.61
b264	22.16	Done	14	p8165			p8946	21.8	Done	7	8	2	1			p8946		21.8	Done	7	8	1	0	50		21.8
p295	23.03	Done	11	p8530*			p8947	21.76	Done	7	11	2	1			p8947		21.76	Done	7	11	1	0	25		21.76
p405	20.52	Done	10	p8364			p8962	30.11	Done	6	7	2	1			p8962		30.11	Done	6	7	2	0	25		30.11
p473	21.13	Done	13	b4504			b4911	19.73	Done	10	7	2	0			b4911		19.73	Done	10	7	3	0	37.5		19.73
p502	27.95	Done	10	p8498			u11480	20.41	Done	6	10	1	1			u11480		20.41	Done	6	10	1	1	31.25		20.41
p688	24.03	Done	7	p8497			p9135	20.95	Done	11	5	3	1			p9135		20.95	Done	11	5	2	1	46.66		20.95
b873	21.71	Done	8	p8522			b5221	23.96	Done	12	10	2	1			b5221		23.96	Done	12	10	2	1	31.25		23.96
p1518	21.68	Done	12	b4595			b5347	22.4	Done	11	10	3	1			b5347		22.4	Done	11	10	2	1	50		22.4
p1586	20.51	Done	10	p8639			b4704	20.24	Done	10	7	1	1			b4704		20.24	Done	10	7	1	1	31.25		20.24
P1732	24.19	Done	8	p8693			p70	21.37	Done	7	8	1	1			p70		21.37	Done	7	8	2	1	43.75		21.37
b1346	21.59	Done	10	p8877			b27	20.78	Done	11	10	1	1			b27		20.78	Done	11	10	1	0	25		20.78
p2308	20.61	Done	10	u11420			b6664	19.46	Done	7	7	1	1			b6664		19.46	Done	7	7	2	0	40		19.46
p2379	22.96	Done	7	p8945			p194	20.83	Done	7	10	1	0			p194		20.83	Done	7	10	3	1	31.25		20.83
b1733	19.69	Done	10	p8946			b264	22.16	Done	14	10	1	0			b264		22.16	Done	14	10	2	1	43.75		22.16
p2625	18.66	Done	13	p8947			p295	23.03	Done	11	10	1	0			p295		23.03	Done	11	10	2	1	43.75		23.03
p3241	22.59	Done	7	p8962			p405	20.52	Done	10	9	2	0			p405		20.52	Done	10	9	2	0	18.75		20.52
p3269	20.76	Done	10	b4911			p473	21.13	Done	13	10	3	0			p473		21.13	Done	13	10	2	1	31.25		21.13
p3511	19.69	Done	7	p9026			p496	22.51	Done	10	5	1	1			p496		22.51	Done	10	5	1	1	40		22.51
b6705	23.15	Done	8	u11480			p502	27.95	Done	10	8	1	1			p502		27.95	Done	10	8	1	1	46.66		27.95
P3694	19.9	Done	10	p9135			p688	24.03	Done	7	7	2	1			p688		24.03	Done	7	7	2	1	31.25		24.03
P3895	20.95	Done	9	p9158			P798	25	Done	10	9	2	1			P798		25	Done	10	9	1	0	31.25		25
b7573*	19.31	Done	8	p9358			p1028	21.33	Done	5	9	2	1			p1028		21.33	Done	5	9	3	0	26.66		21.33
P3984	22.06	Done	10	p9263			p1032	20.48	Done	13	10	1	1			p1032		20.48	Done	13	10	2	1	46.44		20.48
p4434	22.61	Done	10	b5221			b873	21.71	Done	8	11	2	1			b873		21.71	Done	8	11	2	1	60		21.71
b3076	19.98	Done	8	b5347			p1518	21.68	Done	12	6	2	1			p1518		21.68	Done	12	6	1	0	37.5		21.68
p4656	18.77	Done	10	b5279			u1796	19.53	Done	8	5	2	0			u1796		19.53	Done	8	5	1	1	31.25		19.53
p4753	19.76	Done	8	b4704*			p1586	20.51	Done	10	5	1	1			p1586		20.51	Done	10	5	1	1	64.28		20.51
p5018	21.42	Done	12	b5163			p1630	21.17	Done	10	11	2	1			p1630		21.17	Done	10	11	1	1	56.25		21.17
p5315	20.39	Done	10	p34			p1683	22.2	Done	10	8	1	1			p1683		22.2	Done	10	8	1	1	43.75		22.2
p5885	20.7	Done	9	p70			P1732	24.19	Done	8	12	2	1			P1732		24.19	Done	8	12	2	0	18.75		24.19
p6073	20.31	Done	10	b27			b1346	21.59	Done	10	6	1	0			b1346		21.59	Done	10	6	1	1	50		21.59
p6452	23.29	Done	6	p105			p2267	21.17	Done	7	11	2	0			p2267		21.17	Done	7	11	2	0	18.75		21.17
				b5192			p2271	19.15	Done	6	10	1	1			p2271		19.15	Done	6	10	2	0	25		19.15
				b6573*			b1471	18.89	Done	9	8	2	1			b1471		18.89	Done	9	8	1	1	50		18.89
				b6619*			p2284	22.29	Done	7	5	2	1			p2284		22.29	Done	7	5	2	0	25		22.29
				b54			p2315	21	Done	12	12	1	1			p2315		21	Done	12	12	2	1	43.75		21
				b6664*			p2308	20.61	Done	10	8	2	0			p2308		20.61	Done	10	8	2	0	25		20.61
				p194			p2379	22.96	Done	7	6	3	1			p2379		22.96	Done	7	6	1	0	31.25		22.96
				b264			b1733	19.69	Done	10	11	2	1			b1733		19.69	Done	10	11	2	1	46.66		19.69
				p295			p2625	18.66	Done	13	6	2	1			p2625		18.66	Done	13	6	2	1	37.5		18.66
				u284			p2823	21.85	Done	8	6	3	0			p2823		21.85	Done	8	6	2	1	37.5		21.85
				p348			p2930	22.27	Done	13	10	1	1			p2930		22.27	Done	13	10	2	1	37.5		22.27
				p405			p3241	22.59	Done	7	6	2	0			p3241		22.59	Done	7	6	2	0	37.5		22.59
				p473			p3269	20.76	Done	10	9	2	1			p3269		20.76	Done	10	9	2	0	25		20.76
				p496			p3511	19.69	Done	7	10	1	1			p3511		19.69	Done	7	10	3	1	50		19.69
				p502			b6705	23.15	Done	8	10	1	1			b6705		23.15	Done	8	10	3	1	33.33		23.15
				p688			P3694	19.9	Done	10	10	2	1			P3694		19.9	Done	10	10	2	1	31.25		19.9
				P798			P3895	20.95	Done	9	5	1	0			P3895		20.95	Done	9	5	2	1	31.25		20.95
				p828			b3968	21.53	Done	11	5	1	1			b3968		21.53	Done	11	5	2	1	37.5		21.53
				P997			p4079	19.71	Done	7	5	2	1			p4079		19.71	Done	7	5	3	1	37.5		19.71
				p1028			b7573*	19.31	Done	8	6	3	0			b7573*		19.31	Done	8	6	1	0	18.75		19.31
				p1032			P3984	22.06	Done	10	8	2	1			P3984		22.06	Done	10	8	2	1	25		22.06
				p1119			b3021	21.29	Done	9	10	2	0			b3021		21.29	Done	9	10	2	1	33.33		21.29
				p1026			b9400*	19.57	Done	7	12	1	0			b9400*		19.57	Done	7	12	3	1	25		19.57
				b664			p4492	21.38	Done	10	7	2	1			p4492		21.38	Done	10	7	2	1	37.5		21.38
				b873			p4434	22.61	Done	10	11	2	1			p4434		22.61	Done	10	11	2	1	43.75		22.61
				p1363			p4486	19.93	Done	13	11	2	1			p4486		19.93	Done	13	11	2	1	50		19.93
				p1518			b3076	19.98	Done	8	11	1	0			b3076		19.98	Done	8	11	2	1	31.25		19.98
				u1796			p4656	18.77	Done	10	5	1	1			p4656		18.77	Done	10	5	1	1	53.33		18.77
				b1021			b9470*	19.14	Done	7	10	2	0			b9470*		19.14	Done	7	10	3	1	43.75		19.14
				p1586			p4753	19.76	Done	8	11	1	1			p4753		19.76	Done	8	11	2	1	31.25		19.76
				p1630			p5018	21.42	Done	12	8	1	1			p5018		21.42	Done	12	8	2	1	31.25		21.42
				p1683			p5315	20.39	Done	10	6	1	1			p5315		20.39	Done	10	6	1	1	43.75		20.39
				P1724			p5799	20.42	Done	10	11	2	0			p5799		20.42	Done	10	11	2	0	20		20.42
				P1732			p5885	20.7	Done	9	8	2	0			p5885		20.7	Done	9	8	1	1	31.25		20.7
				p1869			p6014	24.37	Done	7	10	2	1			p6014		24.37	Done	7	10	3	1	25		24.37
				b1346			p6073	20.31	Done	10	10	1	1			p6073		20.31	Done	10	10	2	1	37.5		20.31
				p2150			b4348	21.6	Done	10	5	2	0			b4348		21.6	Done	10	5	2	1	66.66		21.6
				p2225			p6192	19.9	Done	10	10	1	1			p6192		19.9	Done	10	10	3	0	18.75		19.9
				p2267			p6452	23.29	Done	6	6	2	0			p6452		23.29	Done	6	6	2	1	50		23.29
				p2271								2	0
				b1471								1	1
				p2284								2	0
				p2315								2	1
				U2753								1	1
				p2308								2	0
				p2357								1	1
				p2379								1	0
				p2416								1	1
				b1733								2	1
				p2625								2	1
				p2737								1	1
				p2738								2	1
				p2806								2	1
				p2823								2	1
				p2796								3	0
				p2902								1	1
				p2929								2	1
				p2930								2	1
				b1897								2	1
				p3241								2	0
				p3269								2	0
				p3510								1	0
				p3511								3	1
				p3513								2	1
				P3488								1	1
				b6705								3	1
				P3694								2	1
				P3895								2	1
				b2670								1	0
				b3968								2	1
				p4075								2	1
				p4079								3	1
				b7573*								1	0
				p3961								1	1
				P3984								2	1
				p8499*								3	1
				b2969								1	0
				b3021								2	1
				b9400*								3	1
				p4492								2	1
				p4434								2	1
				p4486								2	1
				b3076								2	1
				p4656								1	1
				b9470*								3	1
				p4753								2	1
				u6041								2	1
				p5018								2	1
				b3417								2	1
				p5205								1	0
				p5315								1	1
				u6774								3	1
				p5799								2	0
				p5885								1	1
				p6014								3	1
				p6073								2	1
				b4348								2	1
				p6192								3	0
				p6452								2	1

## Sheet: Sheet2
ID	PCR	MRSA/MSSA	MRSA	Score	sample
p6878			MRSA	1
p6574	Done	MSSA	MSSA	0	Pus
p6994	Done	MRSA	MRSA	1	Tissue
p7070	Done	MRSA	MRSA	1	Sputum
b3624		MSSA*	MSSA	0	Blood*
p7081	Done	MRSA	MRSA	1	Pus
p7439			MRSA	1
p7588	Done	MRSA	MRSA	1	Pus
p7683	Done	MRSA	MRSA	1	Pus
p7852	Done	MRSA	MRSA	1	Pus
u9937	Done	MSSA	MSSA	0	Urine
p7882	Done	MRSA	MRSA	1	Pus
p7923			MRSA	1
p7925	Done	MRSA	MRSA	1	Pus
p6680*	Done	MSSA	MSSA	0	Tissue
p7953	Done	MRSA	MRSA	1	Ascitic fluid/ Peritoneal fluid
p7992	Done	MRSA	MRSA	1	Tissue
p8088	Done	MRSA	MRSA	1	Pus
p8126	Done	MRSA	MRSA	1	Pus
p8303			MSSA	0
p8165			MRSA	1
p8530*			MRSA	1
p8364			MRSA	1
b4504	Done	MSSA	MSSA	0	Blood
p8498	Done	MRSA	MRSA	1	Pus
p8497			MRSA	1
p8522	Done	MRSA	MRSA	1	Pus
b4595	Done	MRSA	MRSA	1	Blood
p8639			MRSA	1
p8693	Done	MRSA	MRSA	1	Pus
p8877	Done	MRSA	MRSA	1	Pus
u11420	Done	MRSA	MRSA	1	Urine
p8945	Done	MSSA	MSSA	0	Pus
p8946	Done	MSSA	MSSA	0	Pus
p8947	Done	MSSA	MSSA	0	Pus
p8962	Done	MSSA	MSSA	0	Pus
b4911	Done	MSSA	MSSA	0	Blood
p9026			MRSA	1
u11480	Done	MRSA	MRSA	1	Urine
p9135	Done	MRSA	MRSA	1	Pus
p9158			MRSA	1
p9358			MRSA	1
p9263			MRSA	1
b5221	Done	MRSA	MRSA	1	Blood
b5347	Done	MRSA	MRSA	1	Blood
b5279		MSSA*	MSSA	0	Blood*
b4704	Done	MRSA	MRSA	1	Blood
b5163		MRSA	MRSA	1	Blood
p34			MRSA	1
p70	Done	MRSA	MRSA	1	Pus
b27	Done	MSSA	MSSA	0	Blood
p105			MSSA	0
b5192		MRSA	MRSA	1	Blood
b6573*		MRSA	MRSA	1	Blood
b6619*		MRSA	MRSA	1	Blood
b54		MRSA	MRSA	1	Blood
b6664	Done	MSSA	MSSA	0	Blood
p194	Done	MRSA	MRSA	1	Conjunctival swab
b264	Done	MRSA	MRSA	1	Blood
p295	Done	MRSA	MRSA	1	Pus
u284			MSSA	0
p348	Done	MRSA	MRSA	1	Pus
p405	Done	MSSA	MSSA	0	Pus
p473	Done	MRSA	MRSA	1	Tissue
p496	Done	MRSA	MRSA	1	Pus
p502	Done	MRSA	MRSA	1	Tissue
p688	Done	MRSA	MRSA	1	Pus
P798	Done	MSSA	MSSA	0	Pus
p828			MRSA	1
P997			MRSA	1
p1028	Done	MSSA	MSSA	0	Pus
p1032	Done	MRSA	MRSA	1	Pus
p1119			MSSA	0
p1026			MSSA	0
b664			MRSA	1
b873	Done	MRSA	MRSA	1	Blood
p1363	Done	MRSA	MRSA	1	Pus
p1518	Done	MSSA	MSSA	0	Pus
u1796	Done	MRSA	MRSA	1	Urine
b1021		MSSA*	MSSA	0	Blood*
p1586	Done	MRSA	MRSA	1	Pus
p1630	Done	MRSA	MRSA	1	Pus
p1683	Done	MRSA	MRSA	1	Pus
P1724			MSSA	0
P1732	Done	MSSA	MSSA	0	Pus
p1869			MRSA	1
b1346	Done	MRSA	MRSA	1	Blood
p2150			MSSA	0
p2225			MRSA	1
p2267	Done	MSSA	MSSA	0	Pus
p2271	Done	MSSA	MSSA	0	Pus
b1471	Done	MRSA	MRSA	1	Blood
p2284	Done	MSSA	MSSA	0	Pus
p2315	Done	MRSA	MRSA	1	Pus
U2753			MRSA	1
p2308	Done	MSSA	MSSA	0	Tissue
p2357			MRSA	1
p2379	Done	MSSA	MSSA	0	Pus
p2416			MRSA	1
b1733	Done	MRSA	MRSA	1	Blood
p2625	Done	MRSA	MRSA	1	Pus
p2737			MRSA	1
p2738			MRSA	1
p2806			MRSA	1
p2823	Done	MRSA	MRSA	1	Bandage contact lens
p2796			MSSA	0
p2902			MRSA	1
p2929			MRSA	1
p2930	Done	MRSA	MRSA	1	Conjunctival swab
b1897		MRSA*	MRSA	1	Blood*
p3241	Done	MSSA	MSSA	0	Pus
p3269	Done	MSSA	MSSA	0	Pus
p3510			MSSA	0
p3511	Done	MRSA	MRSA	1	Pus
p3513			MRSA	1
P3488			MRSA	1
b6705	Done	MRSA	MRSA	1	Blood
P3694	Done	MRSA	MRSA	1	Pus
P3895	Done	MRSA	MRSA	1	Pus
b2670		MSSA*	MSSA	0	Blood*
b3968	Done	MRSA	MRSA	1	Blood
p4075			MRSA	1
p4079	Done	MRSA	MRSA	1	Pus
b7573*	Done	MSSA	MSSA	0	Blood
p3961			MRSA	1
P3984	Done	MRSA	MRSA	1	Pus
p8499*			MRSA	1
b2968/9		MSSA*	MSSA	0	Blood*
b3021	Done	MRSA	MRSA	1	Blood
b9400*	Done	MRSA	MRSA	1	Blood
p4492	Done	MRSA	MRSA	1	Pus
p4434	Done	MRSA	MRSA	1	Epidermal Tissue
p4486	Done	MRSA	MRSA	1	Pus
b3076	Done	MRSA	MRSA	1	Blood
p4656	Done	MRSA	MRSA	1	Pus
b9470*	Done	MRSA	MRSA	1	ET
p4753	Done	MRSA	MRSA	1	TT
u6041			MRSA	1
p5018	Done	MRSA	MRSA	1	Pus
b3417		MRSA*	MRSA	1	Blood*
p5205			MSSA	0
p5315	Done	MRSA	MRSA	1	Pus
u6774		MRSA*	MRSA	1	Urine*
p5799	Done	MSSA	MSSA	0	Pus
p5885	Done	MRSA	MRSA	1	Pus
p6014	Done	MRSA	MRSA	1	Pus
p6073	Done	MRSA	MRSA	1	BAL
b4348	Done	MRSA	MRSA	1	Blood
p6192	Done	MSSA	MSSA	0	Pus
p6452	Done	MRSA	MRSA	1	Pus

## Sheet: Sheet9
ID	maldi & capsule
p6878	Done
p6574	Done
p6994	Done
p7070	Done
b3624	Done
p7081	Done
p7439	Done
p7588	Done
p7683	Done
p7852	Done
u9937	Done
p7882	Done
p7923	Done
p7925	Done
p6680*	Done
p7953	Done
p7992	Done
p8088	Done
p8126	Done
p8303	Done
p8165	Done
p8530*	Done
p8364	Done
b4504	Done
p8498	Done
p8497	Done
p8522	Done
b4595	Done
p8639	Done
p8693	Done
p8877	Done
u11420	Done
p8945	Done
p8946	Done
p8947	Done
p8962	Done
b4911	Done
p9026	Done
u11480	Done
p9135	Done
p9158	Done
p9358	Done
p9263	Done
b5221	Done
b5347	Done
b5279	Done
b4704*	Done
b5163	Done
p34	Done
p70	Done
b27	Done
p105	Done
b5192	Done
b6573*	Done
b6619*	Done
b54	Done
b6664*	Done
p194	Done
b264	Done
p295	Done
u284	Done
p348	Done
p405	Done
p473	Done
p496	Done
p502	Done
p688	Done
P798	Done
p828	Done
P997	Done
p1028	Done
p1032	Done
p1119	Done
p1026	Done
b664	Done
b873	Done
p1363	Done
p1518	Done
u1796	Done
b1021	Done
p1586	Done
p1630	Done
p1683	Done
P1724	Done
P1732	Done
p1869	Done
b1346	Done
p2150	Done
p2225	Done
p2267	Done
p2271	Done
b1471	Done
p2284	Done
p2315	Done
U2753	Done
p2308	Done
p2357	Done
p2379	Done
p2416	Done
b1733	Done
p2625	Done
p2737	Done
p2738	Done
p2806	Done
p2823	Done
p2796	Done
p2902	Done
p2929	Done
p2930	Done
b1897	Done
p3241	Done
p3269	Done
p3510	Done
p3511	Done
p3513	Done
P3488	Done
b6705	Done
P3694	Done
P3895	Done
b2670	Done
b3968	Done
p4075	Done
p4079	Done
b7573*	Done
p3961	Done
P3984	Done
p8499*	Done
b2969	Done
b3021	Done
b9400*	Done
p4492	Done
p4434	Done
p4486	Done
b3076	Done
p4656	Done
b9470*	Done
p4753	Done
u6041	Done
p5018	Done
b3417	Done
p5205	Done
p5315	Done
u6774	Done
p5799	Done
p5885	Done
p6014	Done
p6073	Done
b4348	Done
p6192	Done
p6452	Done

## Sheet: capsule ast
	ID	BP	O	GEN	CIP	LEV	E	CLIN	LIN	DAP	TEI	VAN	TETRA	NIT	RIF	T/S	TIG	R%	S%	I%
1	p5205	R	S	S	R	R	R	S	S	S	S	S	S	S	S	R	S	31	69
	p5205msa	R	S	S	R	R	R	S	S	S	S	S	S	S	S	R	S
2	b4348	R	R	R	R	R	R	R	S		S	S	R	S	R	R	S	67	33
	b4348msa	R	R	S	R	R	S	R	S	S	S	S	S	S	S	R	S
3	u11420	R	R	S	R	R	R	R	S		S	I	S	S	S	S	S	40	53	7
	u11420msa	R	R	S	R	R	R	S	S	S	S	S	S	S	S	S	S
4	p9358	R	R	R	R	R	R	S	S	S	S	S	S	S	S	R	S	44	56
	p9358msa	R	R	R	R	R	R	S	S	S	S	S	S	S	S	R	S
5	p9263	R	R	R	R	R	R	S	S	S	S	S	S	S	S	S	S	37.5	62.5
	p9263msa	R	R	I	R	R	R	S	S	S	S	S	S	S	S	S	S
6	b5221	R	R	I	R	R	S	S	S	S	S	S	S	S	S	R	S	31	63	6
	b5221msa	R	R	S	R	R	S	S	S	S	S	S	S	S	S	S	S
7	b5279	R	R	I	R	R	I	S	S	S	S	S	S	S	S	S	S	25	62.5	12.5
	b5279msa	R	R	S	R	R	R	S	S	S	S	S	S	S	S	S	S
8	p105	R	R	R	R	R	R	R	S	S	S	S	S	S	S	R	S	53	47
	p105msa	R	R	R	R	R	R	R	S	S	S	S	S	S	S	S	S
9	b6573	R	R	S	R	R	S	S	S	S	S	S	S	S	S	R	S	31	69
	b6573msa	R	R	I	R	R	S	S	S	S	S	S	S	S	S	S	S
10	b54	R	R	S	R	R	R	R	S	S	S	S	S	S	S	R	S	47	53
	b54msa	R	R	S	R	R	R	R	S	S	S	S	S	S	S	S	S

## Sheet: Sheet5
ID	RTqPCR	ct
p6878
p6574	Done	21.88
p6994	Done	21.28
p7070	Done	19.79
b3624
p7081	Done	22.63
p7439
p7588
p7683	Done	24.14
p7852	Done	20.92
u9937
p7882	Done	21.72
p7923
p7925	Done	20.98
p6680	Done	20.82
p7953	Done	27.45
p7992	Done	20.41
p8088	Done	28.5
p8126	Done	25.72
p8303
p8165
p8530*
p8364
b4504	Done	21.42
p8498	Done	20.48
p8497
p8522	Done	20.83
b4595
p8639
p8693	Done	28.35
p8877	Done	20.2
u11420	Done	22.89
p8945	Done	20.61
p8946	Done	21.8
p8947	Done	21.76
p8962	Done	30.11
b4911	Done	19.73
p9026
u11480	Done	20.41
p9135	Done	20.95
p9158
p9358
p9263
b5221	Done	23.96
b5347	Done	22.4
b5279
b4704	Done	20.24
b5163
p34
p70	Done	21.37
b27	Done	20.78
p105
b5192
b6573*
b6619*
b54
b6664	Done	19.46
p194	Done	20.83
b264	Done	22.16
p295	Done	23.03
u284
p348
p405	Done	20.52
p473	Done	21.13
p496	Done	22.51
p502	Done	27.95
p688	Done	24.03
P798	Done	25
p828
P997
p1028	Done	21.33
p1032	Done	20.48
p1119
p1026
b664
b873	Done	21.71
p1363
p1518	Done	21.68
u1796	Done	19.53
b1021
p1586	Done	20.51
p1630	Done	21.17
p1683	Done	22.2
P1724
P1732	Done	24.19
p1869
b1346	Done	21.59
p2150
p2225
p2267	Done	21.17
p2271	Done	19.15
b1471	Done	18.89
p2284	Done	22.29
p2315	Done	21
U2753
p2308	Done	20.61
p2357
p2379	Done	22.96
p2416
b1733	Done	19.69
p2625	Done	18.66
p2737
p2738
p2806
p2823	Done	21.85
p2796
p2902
p2929
p2930	Done	22.27
b1897
p3241	Done	22.59
p3269	Done	20.76
p3510
p3511	Done	19.69
p3513
P3488
b6705	Done	23.15
P3694		19.9
P3895	Done	20.95
b2670
b3968	Done	21.53
p4075
p4079	Done	19.71
b7573	Done	19.31
p3961
P3984	Done	22.06
p8499*
b2969
b3021	Done	21.29
b9400*	Done	19.57
p4492	Done	21.38
p4434	Done	22.61
p4486	Done	19.93
b3076	Done	19.98
p4656	Done	18.77
b9470*	Done	19.14
p4753	Done	19.76
u6041
p5018	Done	21.42
b3417
p5205
p5315	Done	20.39
u6774
p5799	Done	20.42
p5885	Done	20.7
p6014	Done	24.37
p6073	Done	20.31
b4348	Done	21.6
p6192	Done	19.9
p6452	Done	23.29
RN6390	Done
IC	Done
NTC	Done

[truncated: 1 more sheets: Sheet3]
